# Supplementary material
Source: publisher site journal article supplement (https://www.dovepress.com/article/421196)
Supplement: Supplementary file 1 [file get_supplementary_file.php]

## Supplementary materials

**Table S1:** List of the enriched terms in disease ontology (DO) for the differentially expressed immuno-inflammation-related genes;

| ID        | Description                                     | Gene  | BgRa      | pvalue   | p.adjust | qvalue   | geneID                                                            | Count |
|-----------|-------------------------------------------------|-------|-----------|----------|----------|----------|-------------------------------------------------------------------|-------|
|           |                                                 | Ratio | tio       |          |          |          |                                                                   |       |
| DOID:229  | female reproductive system disease              | 44921 | 421/10312 | 1.06E-10 | 1.06E-10 | 2.91E-08 | SOCS3/ADM/SLPI/MMP9/PI3/AQP9/IL2RB/FASLG/TGFBR3/KLRC1/CXCL5/KLRD1 | 12    |
| DOID:526  | human immunodeficiency virus infectious disease | 44830 | 222/10312 | 1.92E-09 | 1.92E-09 | 2.65E-07 | SOCS3/SLPI/IL2RB/FASLG/PRF1/GNLY/KLRC1/GZMB/HLA-DQA1              | 9     |
| DOID:1602 | lymphadenitis                                   | 44738 | 70/10312  | 1.63E-08 | 1.63E-08 | 1.12E-06 | S100A12/SOCS3/ADM/MMP9/PRF1/GZMB                                  | 6     |



|         |                               |       |       |         |         |         |                                         |   |  |
|---------|-------------------------------|-------|-------|---------|---------|---------|-----------------------------------------|---|--|
| DOID:36 |                               |       | 113/1 | 2.92E-0 | 2.92E-0 | 8.94E-0 |                                         |   |  |
| 27      | aortic aneurysm               | 44738 | 0312  | 7       | 7       | 6       | ADM/MMP9/FASLG/PRF1/GZMB/HLA-DQA1       | 6 |  |
| DOID:52 |                               |       | 116/1 | 3.41E-0 | 3.41E-0 | 9.40E-0 |                                         |   |  |
| 0       | aortic disease                | 44738 | 0312  | 7       | 7       | 6       | ADM/MMP9/FASLG/PRF1/GZMB/HLA-DQA1       | 6 |  |
| DOID:75 |                               |       | 121/1 | 4.38E-0 | 4.38E-0 | 1.00E-0 |                                         |   |  |
|         | lymphatic system disease      | 44738 | 0312  | 7       | 7       | 5       | S100A12/SOCS3/ADM/MMP9/PRF1/GZMB        | 6 |  |
| DOID:30 | chronic obstructive pulmonary |       | 304/1 | 5.12E-0 | 5.12E-0 | 1.00E-0 | ADM/SLPI/MMP9/PI3/FASLG/TGFBR3/CXCL5/GZ |   |  |
| 83      | disease                       | 44799 | 0312  | 7       | 7       | 5       | MB                                      | 8 |  |
| DOID:23 |                               |       | 305/1 | 5.25E-0 | 5.25E-0 | 1.00E-0 | ADM/SLPI/MMP9/PI3/FASLG/TGFBR3/CXCL5/GZ |   |  |
| 20      | obstructive lung disease      | 44799 | 0312  | 7       | 7       | 5       | MB                                      | 8 |  |



|         |                              |                |       |         |         |         |                                        |   |
|---------|------------------------------|----------------|-------|---------|---------|---------|----------------------------------------|---|
| DOID:12 |                              |                | 235/1 | 1.33E-0 | 1.33E-0 | 1.93E-0 |                                        |   |
| 47      | blood coagulation disease    |                | 44768 |         |         |         | ADM/MMP9/FASLG/F2R/PRF1/THBS1/HLA-DQA1 | 7 |
|         |                              |                | 0312  | 6       | 6       | 5       |                                        |   |
| DOID:10 |                              |                | 359/1 | 1.80E-0 | 1.80E-0 | 2.48E-0 | SOCS3/ADM/NRG1/MMP9/FASLG/PRF1/CBLB/HL |   |
| 4       | bacterial infectious disease |                | 44799 |         |         |         | A-DQA1                                 | 8 |
|         |                              |                | 0312  | 6       | 6       | 5       |                                        |   |
| DOID:19 |                              |                | 364/1 | 2.00E-0 | 2.00E-0 | 2.55E-0 | S100A12/SOCS3/ADM/NRG1/MMP9/FASLG/PDGF |   |
| 36      | atherosclerosis              |                | 44799 |         |         |         | D/RORA                                 | 8 |
|         |                              |                | 0312  | 6       | 6       | 5       |                                        |   |
| DOID:23 | arteriosclerotic             | cardiovascular | 365/1 | 2.04E-0 | 2.04E-0 | 2.55E-0 | S100A12/SOCS3/ADM/NRG1/MMP9/FASLG/PDGF |   |
| 48      | disease                      |                | 44799 |         |         |         | D/RORA                                 | 8 |
|         |                              |                | 0312  | 6       | 6       | 5       |                                        |   |
| DOID:23 |                              |                | 411/1 | 4.94E-0 | 4.94E-0 | 5.92E-0 | S100A12/SOCS3/ADM/NRG1/MMP9/FASLG/PDGF |   |
| 49      | arteriosclerosis             |                | 44799 |         |         |         | D/RORA                                 | 8 |
|         |                              |                | 0312  | 6       | 6       | 5       |                                        |   |

|         |                           |           |            |       |         |         |         |    |                                        |   |
|---------|---------------------------|-----------|------------|-------|---------|---------|---------|----|----------------------------------------|---|
| DOID:11 |                           |           |            | 188/1 | 5.76E-0 | 5.76E-0 | 6.62E-0 |    |                                        |   |
| 612     | polycystic ovary syndrome |           |            | 44738 |         |         |         |    | SOCS3/ADM/SLPI/MMP9/AQP9/TGFBR3        | 6 |
|         |                           |           |            | 0312  | 6       | 6       | 5       |    |                                        |   |
| DOID:00 | primary                   | bacterial | infectious | 295/1 | 6.02E-0 | 6.02E-0 | 6.64E-0 |    | SOCS3/NRG1/MMP9/FASLG/PRF1/CBLB/HLA-DQ |   |
| 50338   | disease                   |           |            | 44768 |         |         |         |    |                                        | 7 |
|         |                           |           |            | 0312  | 6       | 6       | 5       | A1 |                                        |   |
| DOID:10 |                           |           |            | 306/1 | 7.66E-0 | 7.66E-0 | 8.12E-0 |    | ADM/MMP9/FASLG/XCL1/PDGFD/PRF1/HLA-DQA |   |
| 952     | nephritis                 |           |            | 44768 |         |         |         |    |                                        | 7 |
|         |                           |           |            | 0312  | 6       | 6       | 5       | 1  |                                        |   |
| DOID:14 |                           |           |            | 199/1 | 7.99E-0 | 7.99E-0 | 8.16E-0 |    |                                        |   |
| 14      | ovarian dysfunction       |           |            | 44738 |         |         |         |    | SOCS3/ADM/SLPI/MMP9/AQP9/TGFBR3        | 6 |
|         |                           |           |            | 0312  | 6       | 6       | 5       |    |                                        |   |
| DOID:15 |                           |           |            | 20/10 | 1.58E-0 | 1.58E-0 | 0.0001  |    |                                        |   |
| 80      | diffuse scleroderma       |           |            | 44646 |         |         |         |    | XCL1/CXCL5/HLA-DQA1                    | 3 |
|         |                           |           |            | 312   | 5       | 5       | 55305   |    |                                        |   |

|         |                                |             |          |       |         |         |        |                                   |   |
|---------|--------------------------------|-------------|----------|-------|---------|---------|--------|-----------------------------------|---|
| DOID:11 | adult                          | respiratory | distress | 67/10 | 2.19E-0 | 2.19E-0 | 0.0002 |                                   |   |
| 394     |                                |             | 44677    |       |         |         |        | MMP9/PI3/FASLG/CXCL5              | 4 |
|         | syndrome                       |             |          | 312   | 5       | 5       | 078    |                                   |   |
| DOID:29 |                                |             |          | 240/1 | 2.33E-0 | 2.33E-0 | 0.0002 |                                   |   |
| 21      |                                |             | 44738    |       |         |         |        | ADM/MMP9/XCL1/PDGFD/PRF1/HLA-DQA1 | 6 |
|         | glomerulonephritis             |             |          | 0312  | 5       | 5       | 13774  |                                   |   |
| DOID:00 |                                |             |          | 143/1 | 2.49E-0 | 2.49E-0 | 0.0002 |                                   |   |
| 80599   |                                |             | 44707    |       |         |         |        | SLPI/IL2RB/THBS1/CXCL5/GZMB       | 5 |
|         | Coronavirus infectious disease |             |          | 0312  | 5       | 5       | 21271  |                                   |   |
| DOID:33 |                                |             |          | 72/10 | 2.91E-0 | 2.91E-0 | 0.0002 |                                   |   |
| 26      |                                |             | 44677    |       |         |         |        | ADM/MMP9/FASLG/PRF1               | 4 |
|         | purpura                        |             |          | 312   | 5       | 5       | 50615  |                                   |   |
| DOID:43 | autoimmune                     | disease     | of the   | 74/10 | 3.24E-0 | 3.24E-0 | 0.0002 |                                   |   |
| 8       |                                |             | 44677    |       |         |         |        | MMP9/IL2RB/GZMB/HLA-DQA1          | 4 |
|         | nervous system                 |             |          | 312   | 5       | 5       | 69322  |                                   |   |

|                  |                                   |       |               |              |              |                 |                                 |   |
|------------------|-----------------------------------|-------|---------------|--------------|--------------|-----------------|---------------------------------|---|
| DOID:00<br>60056 | hypersensitivity reaction disease | 44707 | 152/1<br>0312 | 3.34E-0<br>5 | 3.34E-0<br>5 | 0.0002<br>69322 | ADM/MMP9/FASLG/CXCL5/HLA-DQA1   | 5 |
| DOID:00<br>80809 | chronic asthma                    | 44677 | 75/10<br>312  | 3.42E-0<br>5 | 3.42E-0<br>5 | 0.0002<br>69322 | SLPI/MMP9/XCL1/HLA-DQA1         | 4 |
| DOID:86<br>5     | vasculitis                        | 44707 | 154/1<br>0312 | 3.55E-0<br>5 | 3.55E-0<br>5 | 0.0002<br>72248 | MMP9/KLRC1/CXCL5/KLRD1/GZMB     | 5 |
| DOID:11<br>00    | ovarian disease                   | 44738 | 261/1<br>0312 | 3.73E-0<br>5 | 3.73E-0<br>5 | 0.0002<br>78165 | SOCS3/ADM/SLPI/MMP9/AQP9/TGFBR3 | 6 |
| DOID:22<br>13    | hemorrhagic disease               | 44677 | 78/10<br>312  | 3.99E-0<br>5 | 3.99E-0<br>5 | 0.0002<br>89628 | ADM/MMP9/FASLG/PRF1             | 4 |



|         |                             |       |         |         |        |       |                                         |   |
|---------|-----------------------------|-------|---------|---------|--------|-------|-----------------------------------------|---|
| DOID:10 |                             | 416/1 | 5.58E-0 | 5.58E-0 | 0.0003 |       |                                         |   |
| 534     | stomach cancer              | 44768 | 0312    | 5       | 5      | 90878 | SLPI/MMP9/FASLG/F2R/CBLB/CXCL5/HLA-DQA1 | 7 |
| DOID:52 |                             | 417/1 | 5.67E-0 | 5.67E-0 | 0.0003 |       |                                         |   |
| 95      | intestinal disease          | 44768 | 0312    | 5       | 5      | 90878 | S100A12/SOCS3/NRG1/MMP9/AQP9/FASLG/PRF  | 7 |
| DOID:11 |                             | 31/10 | 6.10E-0 | 6.10E-0 | 0.0004 |       |                                         |   |
| 123     | Henoch-Schoenlein purpura   | 44646 | 312     | 5       | 5      | 10573 | ADM/MMP9/HLA-DQA1                       | 3 |
| DOID:90 |                             | 32/10 | 6.72E-0 | 6.72E-0 | 0.0004 |       |                                         |   |
| 65      | leishmaniasis               | 44646 | 312     | 5       | 5      | 31252 | IL2RB/FASLG/HLA-DQA1                    | 3 |
| DOID:98 |                             | 32/10 | 6.72E-0 | 6.72E-0 | 0.0004 |       |                                         |   |
| 09      | hypersensitivity vasculitis | 44646 | 312     | 5       | 5      | 31252 | ADM/MMP9/HLA-DQA1                       | 3 |

|         |                                    |       |         |         |        |                               |   |
|---------|------------------------------------|-------|---------|---------|--------|-------------------------------|---|
| DOID:15 | hypersensitivity reaction type III | 35/10 | 8.83E-0 | 8.83E-0 | 0.0005 |                               |   |
|         |                                    | 44646 |         |         |        | ADM/MMP9/HLA-DQA1             | 3 |
| 57      | disease                            | 312   | 5       | 5       | 53344  |                               |   |
| DOID:10 | pre-eclampsia                      | 309/1 | 9.56E-0 | 9.56E-0 | 0.0005 |                               |   |
|         |                                    | 44738 |         |         |        | SOCS3/ADM/MMP9/AQP9/FASLG/F2R | 6 |
| 591     |                                    | 0312  | 5       | 5       | 8608   |                               |   |
| DOID:97 | type 1 diabetes mellitus           | 192/1 | 0.0001  | 0.0001  | 0.0006 |                               |   |
|         |                                    | 44707 |         |         |        | MMP9/FASLG/PRF1/CBLB/HLA-DQA1 | 5 |
| 44      |                                    | 0312  | 01643   | 01643   | 09393  |                               |   |
| DOID:11 | respiratory failure                | 102/1 | 0.0001  | 0.0001  | 0.0006 |                               |   |
|         |                                    | 44677 |         |         |        | MMP9/PI3/FASLG/CXCL5          | 4 |
| 162     |                                    | 0312  | 14109   | 14109   | 69575  |                               |   |
| DOID:39 | tuberculosis                       | 201/1 | 0.0001  | 0.0001  | 0.0006 |                               |   |
|         |                                    | 44707 |         |         |        | SOCS3/NRG1/MMP9/FASLG/PRF1    | 5 |
| 9       |                                    | 0312  | 26153   | 26153   | 98308  |                               |   |

|         |                                 |       |        |        |        |       |                                   |   |
|---------|---------------------------------|-------|--------|--------|--------|-------|-----------------------------------|---|
| DOID:55 |                                 | 7/103 | 0.0001 | 0.0001 | 0.0006 |       |                                   |   |
| 9       | acute pyelonephritis            | 44618 | 12     | 27385  | 27385  | 98308 | ADM/MMP9                          | 2 |
| DOID:55 |                                 | 202/1 | 0.0001 | 0.0001 | 0.0006 |       |                                   |   |
| 17      | stomach carcinoma               | 44707 | 0312   | 29134  | 29134  | 98308 | MMP9/FASLG/F2R/CBLB/HLA-DQA1      | 5 |
| DOID:97 |                                 | 202/1 | 0.0001 | 0.0001 | 0.0006 |       |                                   |   |
| 4       | upper respiratory tract disease | 44707 | 0312   | 29134  | 29134  | 98308 | ADM/MMP9/FASLG/CXCL5/HLA-DQA1     | 5 |
| DOID:12 |                                 | 110/1 | 0.0001 | 0.0001 | 0.0008 |       |                                   |   |
| 894     | Sjogren's syndrome              | 44677 | 0312   | 52914  | 52914  | 01939 | MMP9/FASLG/THBS1/HLA-DQA1         | 4 |
| DOID:67 |                                 | 337/1 | 0.0001 | 0.0001 | 0.0008 |       |                                   |   |
| 13      | cerebrovascular disease         | 44738 | 0312   | 54113  | 54113  | 01939 | ADM/NRG1/SLPI/MMP9/FASLG/HLA-DQA1 | 6 |

|         |                              |  |       |       |        |        |        |                                  |   |
|---------|------------------------------|--|-------|-------|--------|--------|--------|----------------------------------|---|
| DOID:13 |                              |  |       | 113/1 | 0.0001 | 0.0001 | 0.0008 |                                  |   |
| 241     | Behcet's disease             |  | 44677 | 0312  | 6967   | 6967   | 6654   | MMP9/KLRC1/KLRD1/GZMB            | 4 |
| DOID:12 | newborn respiratory distress |  | 44646 | 44/10 | 0.0001 | 0.0001 | 0.0008 |                                  |   |
| 716     | syndrome                     |  | 312   | 75972 | 75972  | 82384  |        | MMP9/PI3/FASLG                   | 3 |
| DOID:15 |                              |  |       | 218/1 | 0.0001 | 0.0001 | 0.0009 |                                  |   |
| 20      | colon carcinoma              |  | 44707 | 0312  | 84621  | 84621  | 09223  | FASLG/F2R/PRF1/CXCL5/HLA-DQA1    | 5 |
| DOID:34 |                              |  |       | 220/1 | 0.0001 | 0.0001 | 0.0009 |                                  |   |
| 54      | brain infarction             |  | 44707 | 0312  | 92668  | 92668  | 29561  | ADM/NRG1/SLPI/MMP9/HLA-DQA1      | 5 |
| DOID:47 |                              |  |       | 352/1 | 0.0001 | 0.0001 | 0.0009 |                                  |   |
| 66      | embryoma                     |  | 44738 | 0312  | 95492  | 95492  | 29561  | SLPI/MMP9/AQP9/IL2RB/FASLG/PDGFD | 6 |

|         |                        |       |        |        |        |       |                                |   |
|---------|------------------------|-------|--------|--------|--------|-------|--------------------------------|---|
| DOID:43 |                        | 47/10 | 0.0002 | 0.0002 | 0.0010 |       |                                |   |
| 7       | myasthenia gravis      | 44646 | 312    | 14369  | 14369  | 00642 | IL2RB/GZMB/HLA-DQA1            | 3 |
| DOID:10 |                        | 9/103 | 0.0002 | 0.0002 | 0.0010 |       |                                |   |
| 854     | salivary gland disease | 44618 | 12     | 17697  | 17697  | 00642 | SLPI/MMP9                      | 2 |
| DOID:15 |                        | 238/1 | 0.0002 | 0.0002 | 0.0012 |       |                                |   |
| 75      | rheumatic disease      | 44707 | 0312   | 77789  | 77789  | 16053 | MMP9/XCL1/THBS1/CXCL5/HLA-DQA1 | 5 |
| DOID:41 |                        | 238/1 | 0.0002 | 0.0002 | 0.0012 |       |                                |   |
| 8       | systemic scleroderma   | 44707 | 0312   | 77789  | 77789  | 16053 | MMP9/XCL1/THBS1/CXCL5/HLA-DQA1 | 5 |
| DOID:41 |                        | 238/1 | 0.0002 | 0.0002 | 0.0012 |       |                                |   |
| 9       | scleroderma            | 44707 | 0312   | 77789  | 77789  | 16053 | MMP9/XCL1/THBS1/CXCL5/HLA-DQA1 | 5 |

|         |                           |       |        |        |        |       |                                  |   |
|---------|---------------------------|-------|--------|--------|--------|-------|----------------------------------|---|
| DOID:68 |                           | 378/1 | 0.0002 | 0.0002 | 0.0012 |       |                                  |   |
| 8       | embryonal cancer          | 44738 | 0312   | 87733  | 87733  | 39901 | SLPI/MMP9/AQP9/IL2RB/FASLG/PDGFD | 6 |
| DOID:23 |                           | 246/1 | 0.0003 | 0.0003 | 0.0013 |       |                                  |   |
| 77      | multiple sclerosis        | 44707 | 0312   | 23712  | 23712  | 73482 | MMP9/FASLG/PRF1/GZMB/HLA-DQA1    | 5 |
| DOID:00 |                           | 11/10 | 0.0003 | 0.0003 | 0.0013 |       |                                  |   |
| 50827   | rheumatic heart disease   | 44618 | 312    | 31562  | 31562  | 85475 | MMP9/HLA-DQA1                    | 2 |
| DOID:30 |                           | 254/1 | 0.0003 | 0.0003 | 0.0015 |       |                                  |   |
| 82      | interstitial lung disease | 44707 | 0312   | 75202  | 75202  | 44429 | MMP9/FASLG/F2R/CXCL5/GZMB        | 5 |
| DOID:00 |                           | 58/10 | 0.0004 | 0.0004 | 0.0015 |       |                                  |   |
| 80811   | extrinsic asthma          | 44646 | 312    | 00496  | 00496  | 94152 | SLPI/MMP9/XCL1                   | 3 |

|         |                       |       |        |        |        |       |                                    |   |
|---------|-----------------------|-------|--------|--------|--------|-------|------------------------------------|---|
| DOID:94 |                       | 58/10 | 0.0004 | 0.0004 | 0.0015 |       |                                    |   |
| 15      | allergic asthma       | 44646 | 312    | 00496  | 00496  | 94152 | SLPI/MMP9/XCL1                     | 3 |
| DOID:21 |                       | 403/1 | 0.0004 | 0.0004 | 0.0015 |       |                                    |   |
| 9       | colon cancer          | 44738 | 0312   | 06016  | 06016  | 94152 | MMP9/FASLG/F2R/PRF1/CXCL5/HLA-DQA1 | 6 |
| DOID:32 |                       | 259/1 | 0.0004 | 0.0004 | 0.0015 |       |                                    |   |
| 13      | demyelinating disease | 44707 | 0312   | 10403  | 10403  | 94152 | MMP9/FASLG/PRF1/GZMB/HLA-DQA1      | 5 |
| DOID:86 |                       | 285/1 | 0.0006 | 0.0006 | 0.0024 |       |                                    |   |
| 92      | myeloid leukemia      | 44707 | 0312   | 35529  | 35529  | 18541 | SOCS3/MMP9/FASLG/CBLB/HLA-DQA1     | 5 |
| DOID:29 |                       | 439/1 | 0.0006 | 0.0006 | 0.0024 |       |                                    |   |
| 94      | germ cell cancer      | 44738 | 0312   | 40175  | 40175  | 18541 | SLPI/MMP9/AQP9/IL2RB/FASLG/PDGFD   | 6 |

|         |                             |       |        |        |        |       |                                    |   |
|---------|-----------------------------|-------|--------|--------|--------|-------|------------------------------------|---|
| DOID:23 |                             | 441/1 | 0.0006 | 0.0006 | 0.0024 |       |                                    |   |
| 94      | ovarian cancer              | 44738 | 0312   | 55745  | 55745  | 43888 | NRG1/MMP9/FASLG/F2R/THBS1/HLA-DQA1 | 6 |
| DOID:12 |                             | 16/10 | 0.0007 | 0.0007 | 0.0026 |       |                                    |   |
| 895     | keratoconjunctivitis sicca  | 44618 | 312    | 1782   | 1782   | 39562 | MMP9/FASLG                         | 2 |
| DOID:28 |                             | 168/1 | 0.0007 | 0.0007 | 0.0027 |       |                                    |   |
| 25      | nose disease                | 44677 | 0312   | 6799   | 6799   | 86889 | ADM/MMP9/CXCL5/HLA-DQA1            | 4 |
| DOID:91 |                             | 17/10 | 0.0008 | 0.0008 | 0.0029 |       |                                    |   |
| 46      | visceral leishmaniasis      | 44618 | 312    | 12269  | 12269  | 09288 | IL2RB/HLA-DQA1                     | 2 |
| DOID:35 |                             | 76/10 | 0.0008 | 0.0008 | 0.0031 |       |                                    |   |
| 87      | pancreatic ductal carcinoma | 44646 | 312    | 85426  | 85426  | 30658 | MMP9/FASLG/THBS1                   | 3 |



|         |                                 |          |            |       |        |        |        |       |                           |   |
|---------|---------------------------------|----------|------------|-------|--------|--------|--------|-------|---------------------------|---|
| DOID:27 | parasitic                       | protozoa | infectious | 178/1 | 0.0009 | 0.0009 | 0.0032 |       |                           |   |
| 89      | disease                         |          |            | 44677 | 0312   | 53351  | 53351  | 92167 | NRG1/IL2RB/FASLG/HLA-DQA1 | 4 |
| DOID:85 |                                 |          |            | 78/10 | 0.0009 | 0.0009 | 0.0032 |       |                           |   |
| 52      | chronic myeloid leukemia        |          |            | 44646 | 312    | 5498   | 5498   | 92167 | SOCS3/FASLG/HLA-DQA1      | 3 |
| DOID:10 |                                 |          |            | 19/10 | 0.0010 | 0.0010 | 0.0034 |       |                           |   |
| 930     | borderline personality disorder |          |            | 44618 | 312    | 18147  | 18147  | 57166 | NRG1/MMP9                 | 2 |
| DOID:40 |                                 |          |            | 80/10 | 0.0010 | 0.0010 | 0.0034 |       |                           |   |
| 29      | gastritis                       |          |            | 44646 | 312    | 27913  | 27913  | 57166 | SLPI/MMP9/FASLG           | 3 |
| DOID:14 |                                 |          |            | 183/1 | 0.0010 | 0.0010 | 0.0035 |       |                           |   |
| 85      | cystic fibrosis                 |          |            | 44677 | 0312   | 56983  | 56983  | 12106 | SLPI/MMP9/PI3/FASLG       | 4 |

|         |                             |       |       |        |        |        |                               |   |
|---------|-----------------------------|-------|-------|--------|--------|--------|-------------------------------|---|
| DOID:21 | malignant ovarian surface   | 44707 | 321/1 | 0.0010 | 0.0010 | 0.0035 | MMP9/FASLG/F2R/THBS1/HLA-DQA1 | 5 |
| 51      | epithelial-stromal neoplasm |       | 0312  | 87305  | 87305  | 2785   |                               |   |
| DOID:40 | ovarian carcinoma           | 44707 | 321/1 | 0.0010 | 0.0010 | 0.0035 | MMP9/FASLG/F2R/THBS1/HLA-DQA1 | 5 |
| 01      |                             |       | 0312  | 87305  | 87305  | 2785   |                               |   |
| DOID:00 | COVID-19                    | 44646 | 82/10 | 0.0011 | 0.0011 | 0.0035 | IL2RB/THBS1/GZMB              | 3 |
| 80600   |                             |       | 312   | 0429   | 0429   | 39891  |                               |   |
| DOID:10 | pleural tuberculosis        | 44618 | 20/10 | 0.0011 | 0.0011 | 0.0035 | MMP9/FASLG                    | 2 |
| 6       |                             |       | 312   | 29522  | 29522  | 39891  |                               |   |
| DOID:85 | chronic fatigue syndrome    | 44618 | 20/10 | 0.0011 | 0.0011 | 0.0035 | PRF1/HLA-DQA1                 | 2 |
| 44      |                             |       | 312   | 29522  | 29522  | 39891  |                               |   |

|         |                         |       |       |        |        |        |                               |   |
|---------|-------------------------|-------|-------|--------|--------|--------|-------------------------------|---|
| DOID:00 |                         |       | 22/10 | 0.0013 | 0.0013 | 0.0040 |                               |   |
| 50127   | sinusitis               | 44618 | 312   | 69012  | 69012  | 24194  | MMP9/CXCL5                    | 2 |
| DOID:13 |                         |       | 22/10 | 0.0013 | 0.0013 | 0.0040 |                               |   |
| 52      | paranasal sinus disease | 44618 | 312   | 69012  | 69012  | 24194  | MMP9/CXCL5                    | 2 |
| DOID:15 |                         |       | 22/10 | 0.0013 | 0.0013 | 0.0040 |                               |   |
| 10      | personality disorder    | 44618 | 312   | 69012  | 69012  | 24194  | NRG1/MMP9                     | 2 |
| DOID:30 |                         |       | 22/10 | 0.0013 | 0.0013 | 0.0040 |                               |   |
| 87      | gingivitis              | 44618 | 312   | 69012  | 69012  | 24194  | ADM/MMP9                      | 2 |
| DOID:21 |                         |       | 338/1 | 0.0013 | 0.0013 | 0.0040 |                               |   |
| 52      | ovary epithelial cancer | 44707 | 0312  | 69075  | 69075  | 24194  | MMP9/FASLG/F2R/THBS1/HLA-DQA1 | 5 |

|         |                          |       |       |        |        |        |                        |   |
|---------|--------------------------|-------|-------|--------|--------|--------|------------------------|---|
| DOID:76 | stomach disease          | 44646 | 89/10 | 0.0013 | 0.0013 | 0.0040 | SLPI/MMP9/FASLG        | 3 |
|         |                          |       | 312   | 99621  | 99621  | 24194  |                        |   |
| DOID:37 | pulmonary fibrosis       | 44677 | 198/1 | 0.0014 | 0.0014 | 0.0040 | MMP9/FASLG/F2R/CXCL5   | 4 |
| 70      |                          |       | 0312  | 1538   | 1538   | 24194  |                        |   |
| DOID:48 | bile duct adenocarcinoma | 44677 | 198/1 | 0.0014 | 0.0014 | 0.0040 | SOCS3/MMP9/FASLG/THBS1 | 4 |
| 96      |                          |       | 0312  | 1538   | 1538   | 24194  |                        |   |
| DOID:49 | cholangiocarcinoma       | 44677 | 198/1 | 0.0014 | 0.0014 | 0.0040 | SOCS3/MMP9/FASLG/THBS1 | 4 |
| 47      |                          |       | 0312  | 1538   | 1538   | 24194  |                        |   |
| DOID:00 | breast lobular carcinoma | 44618 | 24/10 | 0.0016 | 0.0016 | 0.0045 | MMP9/FASLG             | 2 |
| 50938   |                          |       | 312   | 30643  | 30643  | 42566  |                        |   |

|         |                              |       |        |        |        |       |                             |
|---------|------------------------------|-------|--------|--------|--------|-------|-----------------------------|
| DOID:34 |                              | 24/10 | 0.0016 | 0.0016 | 0.0045 |       |                             |
| 57      | invasive lobular carcinoma   | 44618 | 312    | 30643  | 30643  | 42566 | MMP9/FASLG 2                |
| DOID:13 |                              | 208/1 | 0.0016 | 0.0016 | 0.0046 |       |                             |
| 98      | parasitic infectious disease | 44677 | 0312   | 96979  | 96979  | 01599 | NRG1/IL2RB/FASLG/HLA-DQA1 4 |
| DOID:48 |                              | 208/1 | 0.0016 | 0.0016 | 0.0046 |       |                             |
| 97      | bile duct carcinoma          | 44677 | 0312   | 96979  | 96979  | 01599 | SOCS3/MMP9/FASLG/THBS1 4    |
| DOID:60 |                              | 355/1 | 0.0017 | 0.0017 | 0.0046 |       |                             |
| 00      | congestive heart failure     | 44707 | 0312   | 01889  | 01889  | 01599 | ADM/NRG1/MMP9/FASLG/THBS1 5 |
| DOID:46 |                              | 209/1 | 0.0017 | 0.0017 | 0.0046 |       |                             |
| 06      | bile duct cancer             | 44677 | 0312   | 27134  | 27134  | 04369 | SOCS3/MMP9/FASLG/THBS1 4    |

|         |                             |       |       |        |        |        |                 |   |
|---------|-----------------------------|-------|-------|--------|--------|--------|-----------------|---|
| DOID:00 |                             |       | 25/10 | 0.0017 | 0.0017 | 0.0046 |                 |   |
| 50598   | extrapulmonary tuberculosis | 44618 | 312   | 69694  | 69694  | 04369  | MMP9/FASLG      | 2 |
| DOID:13 |                             |       | 25/10 | 0.0017 | 0.0017 | 0.0046 |                 |   |
| 133     | HELLP syndrome              | 44618 | 312   | 69694  | 69694  | 04369  | ADM/FASLG       | 2 |
| DOID:94 |                             |       | 25/10 | 0.0017 | 0.0017 | 0.0046 |                 |   |
| 70      | bacterial meningitis        | 44618 | 312   | 69694  | 69694  | 04369  | MMP9/CXCL5      | 2 |
| DOID:13 |                             |       | 98/10 | 0.0018 | 0.0018 | 0.0046 |                 |   |
| 19      | brain cancer                | 44646 | 312   | 46562  | 46562  | 72132  | MMP9/AQP9/FASLG | 3 |
| DOID:14 |                             |       | 98/10 | 0.0018 | 0.0018 | 0.0046 |                 |   |
| 250     | Down syndrome               | 44646 | 312   | 46562  | 46562  | 72132  | MMP9/THBS1/GNLY | 3 |

|         |                      |       |        |        |        |       |                   |
|---------|----------------------|-------|--------|--------|--------|-------|-------------------|
| DOID:75 |                      | 98/10 | 0.0018 | 0.0018 | 0.0046 |       |                   |
| 0       | peptic ulcer disease | 44646 | 312    | 46562  | 46562  | 72132 | MMP9/FASLG/GZMB 3 |
| DOID:11 |                      | 26/10 | 0.0019 | 0.0019 | 0.0047 |       |                   |
| 400     | pyelonephritis       | 44618 | 312    | 14202  | 14202  | 56007 | ADM/MMP9 2        |
| DOID:27 |                      | 26/10 | 0.0019 | 0.0019 | 0.0047 |       |                   |
| 44      | pyelitis             | 44618 | 312    | 14202  | 14202  | 56007 | ADM/MMP9 2        |
| DOID:10 |                      | 27/10 | 0.0020 | 0.0020 | 0.0050 |       |                   |
| 247     | pleurisy             | 44618 | 312    | 6414   | 6414   | 3777  | MMP9/FASLG 2      |
| DOID:13 |                      | 27/10 | 0.0020 | 0.0020 | 0.0050 |       |                   |
| 001     | carotid stenosis     | 44618 | 312    | 6414   | 6414   | 3777  | MMP9/FASLG 2      |

|         |                                    |       |       |        |        |        |            |   |
|---------|------------------------------------|-------|-------|--------|--------|--------|------------|---|
| DOID:10 |                                    |       | 28/10 | 0.0022 | 0.0022 | 0.0052 |            |   |
| 140     | dry eye syndrome                   | 44618 | 312   | 1948   | 1948   | 76805  | MMP9/FASLG | 2 |
| DOID:39 |                                    |       | 28/10 | 0.0022 | 0.0022 | 0.0052 |            |   |
| 62      | thyroid gland follicular carcinoma | 44618 | 312   | 1948   | 1948   | 76805  | MMP9/THBS1 | 2 |
| DOID:79 |                                    |       | 28/10 | 0.0022 | 0.0022 | 0.0052 |            |   |
| 9       | varicose veins                     | 44618 | 312   | 1948   | 1948   | 76805  | MMP9/FASLG | 2 |
| DOID:14 |                                    |       | 29/10 | 0.0023 | 0.0023 | 0.0055 |            |   |
| 00      | lacrimal apparatus disease         | 44618 | 312   | 80199  | 80199  | 62998  | MMP9/FASLG | 2 |
| DOID:47 |                                    |       | 29/10 | 0.0023 | 0.0023 | 0.0055 |            |   |
| 24      | brain edema                        | 44618 | 312   | 80199  | 80199  | 62998  | MMP9/F2R   | 2 |



|         |                          |       |       |        |        |        |                     |   |
|---------|--------------------------|-------|-------|--------|--------|--------|---------------------|---|
| DOID:13 |                          |       | 31/10 | 0.0027 | 0.0027 | 0.0062 |                     |   |
| 129     | severe pre-eclampsia     | 44618 | 312   | 17664  | 17664  | 98345  | ADM/FASLG           | 2 |
| DOID:63 |                          |       | 113/1 | 0.0027 | 0.0027 | 0.0063 |                     |   |
| 3       | myositis                 | 44646 | 0312  | 72342  | 72342  | 71524  | MMP9/THBS1/HLA-DQA1 | 3 |
| DOID:10 |                          |       | 32/10 | 0.0028 | 0.0028 | 0.0065 |                     |   |
| 588     | adrenoleukodystrophy     | 44618 | 312   | 94359  | 94359  | 42898  | ADM/MMP9            | 2 |
| DOID:27 |                          |       | 32/10 | 0.0028 | 0.0028 | 0.0065 |                     |   |
| 99      | bronchiolitis obliterans | 44618 | 312   | 94359  | 94359  | 42898  | MMP9/GZMB           | 2 |
| DOID:11 |                          |       | 34/10 | 0.0032 | 0.0032 | 0.0073 |                     |   |
| 713     | diabetic angiopathy      | 44618 | 312   | 63545  | 63545  | 1749   | ADM/FASLG           | 2 |

|         |                                   |       |       |        |        |        |                          |   |
|---------|-----------------------------------|-------|-------|--------|--------|--------|--------------------------|---|
| DOID:12 |                                   |       | 123/1 | 0.0035 | 0.0035 | 0.0078 |                          |   |
| 236     | primary biliary cholangitis       | 44646 | 0312  | 24006  | 24006  | 37771  | MMP9/GNLY/HLA-DQA1       | 3 |
| DOID:14 |                                   |       | 36/10 | 0.0036 | 0.0036 | 0.0080 |                          |   |
| 83      | gingival disease                  | 44618 | 312   | 53623  | 53623  | 61045  | ADM/MMP9                 | 2 |
| DOID:35 |                                   |       | 127/1 | 0.0038 | 0.0038 | 0.0083 |                          |   |
| 25      | middle cerebral artery infarction | 44646 | 0312  | 56337  | 56337  | 74515  | NRG1/SLPI/MMP9           | 3 |
| DOID:42 |                                   |       | 37/10 | 0.0038 | 0.0038 | 0.0083 |                          |   |
| 51      | conjunctival disease              | 44618 | 312   | 56432  | 56432  | 74515  | SOCS3/MMP9               | 2 |
| DOID:00 |                                   |       | 262/1 | 0.0039 | 0.0039 | 0.0084 |                          |   |
| 50589   | inflammatory bowel disease        | 44677 | 0312  | 18501  | 18501  | 42822  | S100A12/SOCS3/FASLG/PRF1 | 4 |

|         |                                   |       |       |        |        |        |                        |   |
|---------|-----------------------------------|-------|-------|--------|--------|--------|------------------------|---|
| DOID:29 | hypersensitivity reaction type IV | 44646 | 130/1 | 0.0041 | 0.0041 | 0.0088 | FASLG/CXCL5/HLA-DQA1   | 3 |
| 16      | disease                           |       | 0312  | 17773  | 17773  | 03398  |                        |   |
| DOID:12 | respiratory syncytial virus       | 44618 | 39/10 | 0.0042 | 0.0042 | 0.0089 | MMP9/GZMB              | 2 |
| 73      | infectious disease                |       | 312   | 77466  | 77466  | 94742  |                        |   |
| DOID:15 | head and neck carcinoma           | 44677 | 269/1 | 0.0043 | 0.0043 | 0.0089 | SOCS3/MMP9/FASLG/F2R   | 4 |
| 42      |                                   |       | 0312  | 05117  | 05117  | 94742  |                        |   |
| DOID:46 | biliary tract cancer              | 44677 | 269/1 | 0.0043 | 0.0043 | 0.0089 | SOCS3/MMP9/FASLG/THBS1 | 4 |
| 07      |                                   |       | 0312  | 05117  | 05117  | 94742  |                        |   |
| DOID:12 | aplastic anemia                   | 44646 | 133/1 | 0.0043 | 0.0043 | 0.0090 | FASLG/PRF1/HLA-DQA1    | 3 |
| 449     |                                   |       | 0312  | 89804  | 89804  | 34789  |                        |   |

|         |                               |       |        |        |        |       |                      |   |
|---------|-------------------------------|-------|--------|--------|--------|-------|----------------------|---|
| DOID:14 |                               | 133/1 | 0.0043 | 0.0043 | 0.0090 |       |                      |   |
| 43      | cerebral degeneration         | 44646 | 0312   | 89804  | 89804  | 34789 | ADM/MMP9/FASLG       | 3 |
| DOID:10 |                               | 40/10 | 0.0044 | 0.0044 | 0.0091 |       |                      |   |
| 976     | membranous glomerulonephritis | 44618 | 312    | 95641  | 95641  | 84077 | MMP9/HLA-DQA1        | 2 |
| DOID:11 |                               | 276/1 | 0.0047 | 0.0047 | 0.0094 |       |                      |   |
| 934     | head and neck cancer          | 44677 | 0312   | 16936  | 16936  | 9941  | SOCS3/MMP9/FASLG/F2R | 4 |
| DOID:36 |                               | 41/10 | 0.0047 | 0.0047 | 0.0094 |       |                      |   |
| 83      | lung benign neoplasm          | 44618 | 312    | 18886  | 18886  | 9941  | MMP9/FASLG           | 2 |
| DOID:98 |                               | 42/10 | 0.0049 | 0.0049 | 0.0098 |       |                      |   |
| 6       | alopecia areata               | 44618 | 312    | 47178  | 47178  | 5336  | FASLG/HLA-DQA1       | 2 |

|               |                   |       |               |                 |                 |                 |                          |   |
|---------------|-------------------|-------|---------------|-----------------|-----------------|-----------------|--------------------------|---|
| DOID:12<br>05 | allergic disease  | 44646 | 139/1<br>0312 | 0.0049<br>66169 | 0.0049<br>66169 | 0.0098<br>5336  | SOCS3/ADM/HLA-DQA1       | 3 |
| DOID:28<br>93 | cervix carcinoma  | 44646 | 140/1<br>0312 | 0.0050<br>6647  | 0.0050<br>6647  | 0.0099<br>09781 | SOCS3/SLPI/MMP9          | 3 |
| DOID:87<br>19 | in situ carcinoma | 44646 | 140/1<br>0312 | 0.0050<br>6647  | 0.0050<br>6647  | 0.0099<br>09781 | SOCS3/MMP9/FASLG         | 3 |
| DOID:32<br>6  | ischemia          | 44707 | 464/1<br>0312 | 0.0054<br>18594 | 0.0054<br>18594 | 0.0104<br>5069  | ADM/MMP9/FASLG/F2R/THBS1 | 5 |
| DOID:15<br>32 | pleural disease   | 44618 | 44/10<br>312  | 0.0054<br>18802 | 0.0054<br>18802 | 0.0104<br>5069  | MMP9/FASLG               | 2 |

|         |                                   |       |        |        |        |       |            |   |
|---------|-----------------------------------|-------|--------|--------|--------|-------|------------|---|
| DOID:13 |                                   | 46/10 | 0.0059 | 0.0059 | 0.0112 |       |            |   |
| 375     | temporal arteritis                | 44618 | 312    | 10315  | 10315  | 41398 | MMP9/CXCL5 | 2 |
| DOID:52 |                                   | 46/10 | 0.0059 | 0.0059 | 0.0112 |       |            |   |
| 5       | central nervous system vasculitis | 44618 | 312    | 10315  | 10315  | 41398 | MMP9/CXCL5 | 2 |
| DOID:00 |                                   | 47/10 | 0.0061 | 0.0061 | 0.0115 |       |            |   |
| 60074   | ductal carcinoma in situ          | 44618 | 312    | 63468  | 63468  | 63399 | SOCS3/MMP9 | 2 |
| DOID:86 |                                   | 47/10 | 0.0061 | 0.0061 | 0.0115 |       |            |   |
| 6       | vein disease                      | 44618 | 312    | 63468  | 63468  | 63399 | MMP9/FASLG | 2 |
| DOID:94 |                                   | 48/10 | 0.0064 | 0.0064 | 0.0119 |       |            |   |
| 71      | meningitis                        | 44618 | 312    | 2152   | 2152   | 66133 | MMP9/CXCL5 | 2 |

|         |                        |       |       |        |        |        |                |   |
|---------|------------------------|-------|-------|--------|--------|--------|----------------|---|
| DOID:10 |                        |       | 49/10 | 0.0066 | 0.0066 | 0.0123 |                |   |
| 24      | leprosy                | 44618 | 312   | 84446  | 84446  | 72482  | CBLB/HLA-DQA1  | 2 |
| DOID:89 |                        |       | 158/1 | 0.0070 | 0.0070 | 0.0129 |                |   |
| 47      | diabetic retinopathy   | 44646 | 0312  | 85145  | 85145  | 38509  | ADM/MMP9/THBS1 | 3 |
| DOID:10 |                        |       | 51/10 | 0.0072 | 0.0072 | 0.0129 |                |   |
| 73      | renal hypertension     | 44618 | 312   | 24824  | 24824  | 38509  | ADM/MMP9       | 2 |
| DOID:10 |                        |       | 51/10 | 0.0072 | 0.0072 | 0.0129 |                |   |
| 808     | gastric ulcer          | 44618 | 312   | 24824  | 24824  | 38509  | MMP9/FASLG     | 2 |
| DOID:11 |                        |       | 51/10 | 0.0072 | 0.0072 | 0.0129 |                |   |
| 130     | secondary hypertension | 44618 | 312   | 24824  | 24824  | 38509  | ADM/MMP9       | 2 |

|         |                                    |       |       |        |        |        |                        |   |
|---------|------------------------------------|-------|-------|--------|--------|--------|------------------------|---|
| DOID:87 |                                    |       | 51/10 | 0.0072 | 0.0072 | 0.0129 |                        |   |
| 91      | breast carcinoma in situ           | 44618 | 312   | 24824  | 24824  | 38509  | SOCS3/MMP9             | 2 |
| DOID:13 |                                    |       | 161/1 | 0.0074 | 0.0074 | 0.0132 |                        |   |
| 580     | cholestasis                        | 44646 | 0312  | 61773  | 61773  | 76635  | ADM/F2R/HLA-DQA1       | 3 |
| DOID:78 |                                    |       | 53/10 | 0.0077 | 0.0077 | 0.0136 |                        |   |
| 0       | placenta disease                   | 44618 | 312   | 84408  | 84408  | 16267  | MMP9/AQP9              | 2 |
| DOID:88 | parasitic helminthiasis infectious | 44618 | 53/10 | 0.0077 | 0.0077 | 0.0136 |                        |   |
| 3       | disease                            | 44618 | 312   | 84408  | 84408  | 16267  | FASLG/HLA-DQA1         | 2 |
| DOID:49 |                                    |       | 319/1 | 0.0078 | 0.0078 | 0.0136 |                        |   |
| 05      | pancreatic carcinoma               | 44677 | 0312  | 43858  | 43858  | 16267  | SOCS3/MMP9/FASLG/THBS1 | 4 |



|         |                          |       |        |        |        |       |                    |   |
|---------|--------------------------|-------|--------|--------|--------|-------|--------------------|---|
| DOID:55 |                          | 164/1 | 0.0078 | 0.0078 | 0.0136 |       |                    |   |
| 2       | pneumonia                | 44646 | 0312   | 50142  | 50142  | 16267 | SLPI/MMP9/CXCL5    | 3 |
| DOID:49 |                          | 54/10 | 0.0080 | 0.0080 | 0.0139 |       |                    |   |
| 61      | bone marrow disease      | 44618 | 312    | 71343  | 71343  | 0188  | SOCS3/MMP9         | 2 |
| DOID:24 |                          | 166/1 | 0.0081 | 0.0081 | 0.0139 |       |                    |   |
| 62      | retinal vascular disease | 44646 | 0312   | 15621  | 15621  | 0188  | ADM/MMP9/THBS1     | 3 |
| DOID:00 |                          | 167/1 | 0.0082 | 0.0082 | 0.0140 |       |                    |   |
| 60058   | lymphoma                 | 44646 | 0312   | 5034   | 5034   | 45412 | MMP9/PRF1/HLA-DQA1 | 3 |
| DOID:47 |                          | 55/10 | 0.0083 | 0.0083 | 0.0141 |       |                    |   |
|         | prostate disease         | 44618 | 312    | 63008  | 63008  | 49874 | PDGFD/CXCL5        | 2 |

|                  |                             |       |               |                 |                 |                 |                      |   |
|------------------|-----------------------------|-------|---------------|-----------------|-----------------|-----------------|----------------------|---|
| DOID:00<br>60071 | pre-malignant neoplasm      | 44646 | 169/1<br>0312 | 0.0085<br>23752 | 0.0085<br>23752 | 0.0143<br>33909 | SOCS3/MMP9/FASLG     | 3 |
| DOID:65<br>7     | adenoma                     | 44677 | 344/1<br>0312 | 0.0101<br>77295 | 0.0101<br>77295 | 0.0170<br>10854 | ADM/MMP9/FASLG/THBS1 | 4 |
| DOID:10<br>70    | primary open angle glaucoma | 44618 | 62/10<br>312  | 0.0105<br>3511  | 0.0105<br>3511  | 0.0172<br>9448  | MMP9/FASLG           | 2 |
| DOID:49<br>71    | myelofibrosis               | 44618 | 62/10<br>312  | 0.0105<br>3511  | 0.0105<br>3511  | 0.0172<br>9448  | SOCS3/THBS1          | 2 |
| DOID:98<br>7     | alopecia                    | 44618 | 62/10<br>312  | 0.0105<br>3511  | 0.0105<br>3511  | 0.0172<br>9448  | FASLG/HLA-DQA1       | 2 |

|         |                               |       |             |       |        |        |        |                          |   |
|---------|-------------------------------|-------|-------------|-------|--------|--------|--------|--------------------------|---|
| DOID:50 |                               |       |             | 354/1 | 0.0112 | 0.0112 | 0.0181 |                          |   |
| 82      | liver cirrhosis               |       | 44677       | 0312  | 2539   | 2539   | 56423  | MMP9/PDGFD/GNLY/HLA-DQA1 | 4 |
| DOID:43 |                               |       |             | 187/1 | 0.0112 | 0.0112 | 0.0181 |                          |   |
| 62      | cervical cancer               |       | 44646       | 0312  | 26542  | 26542  | 56423  | SOCS3/SLPI/MMP9          | 3 |
| DOID:29 | severe                        | acute | respiratory | 65/10 | 0.0115 | 0.0115 | 0.0181 |                          |   |
| 45      | syndrome                      |       | 44618       | 312   | 34608  | 34608  | 56423  | SLPI/CXCL5               | 2 |
| DOID:29 |                               |       |             | 65/10 | 0.0115 | 0.0115 | 0.0181 |                          |   |
| 86      | IgA glomerulonephritis        |       | 44618       | 312   | 34608  | 34608  | 56423  | MMP9/XCL1                | 2 |
| DOID:36 |                               |       |             | 191/1 | 0.0118 | 0.0118 | 0.0181 |                          |   |
| 20      | central nervous system cancer |       | 44646       | 0312  | 87251  | 87251  | 56423  | MMP9/AQP9/FASLG          | 3 |

|         |                               |       |       |        |        |        |                  |   |
|---------|-------------------------------|-------|-------|--------|--------|--------|------------------|---|
| DOID:30 |                               |       | 192/1 | 0.0120 | 0.0120 | 0.0181 |                  |   |
| 42      | allergic contact dermatitis   | 44646 | 0312  | 55887  | 55887  | 56423  | SOCS3/MMP9/PTGDR | 3 |
| DOID:90 |                               |       | 192/1 | 0.0120 | 0.0120 | 0.0181 |                  |   |
| 74      | systemic lupus erythematosus  | 44646 | 0312  | 55887  | 55887  | 56423  | MMP9/FASLG/PRF1  | 3 |
| DOID:00 |                               |       | 193/1 | 0.0122 | 0.0122 | 0.0181 |                  |   |
| 80014   | chromosomal disease           | 44646 | 0312  | 25912  | 25912  | 56423  | MMP9/THBS1/GNLY  | 3 |
| DOID:00 |                               |       | 5/103 | 0.0125 | 0.0125 | 0.0181 |                  |   |
| 50748   | marginal zone B-cell lymphoma | 44587 | 12    | 45682  | 45682  | 56423  | HLA-DQA1         | 1 |
| DOID:10 |                               |       | 5/103 | 0.0125 | 0.0125 | 0.0181 |                  |   |
| 303     | sialadenitis                  | 44587 | 12    | 45682  | 45682  | 56423  | SLPI             | 1 |

|         |                          |       |       |        |        |        |          |   |
|---------|--------------------------|-------|-------|--------|--------|--------|----------|---|
| DOID:10 |                          |       | 5/103 | 0.0125 | 0.0125 | 0.0181 |          |   |
| 310     | viral meningitis         | 44587 | 12    | 45682  | 45682  | 56423  | MMP9     | 1 |
| DOID:10 |                          |       | 5/103 | 0.0125 | 0.0125 | 0.0181 |          |   |
| 824     | malignant hypertension   | 44587 | 12    | 45682  | 45682  | 56423  | ADM      | 1 |
| DOID:11 |                          |       | 5/103 | 0.0125 | 0.0125 | 0.0181 |          |   |
| 121     | pulpitis                 | 44587 | 12    | 45682  | 45682  | 56423  | MMP9     | 1 |
| DOID:12 |                          |       | 5/103 | 0.0125 | 0.0125 | 0.0181 |          |   |
| 859     | choreatic disease        | 44587 | 12    | 45682  | 45682  | 56423  | HLA-DQA1 | 1 |
| DOID:13 |                          |       | 5/103 | 0.0125 | 0.0125 | 0.0181 |          |   |
| 336     | congenital toxoplasmosis | 44587 | 12    | 45682  | 45682  | 56423  | HLA-DQA1 | 1 |

|               |                     |       |               |                 |                 |                 |                  |   |
|---------------|---------------------|-------|---------------|-----------------|-----------------|-----------------|------------------|---|
| DOID:27<br>03 | synovitis           | 44587 | 5/103<br>12   | 0.0125<br>45682 | 0.0125<br>45682 | 0.0181<br>56423 | MMP9             | 1 |
| DOID:42<br>50 | conjunctivochalasis | 44587 | 5/103<br>12   | 0.0125<br>45682 | 0.0125<br>45682 | 0.0181<br>56423 | MMP9             | 1 |
| DOID:53<br>30 | dental pulp disease | 44587 | 5/103<br>12   | 0.0125<br>45682 | 0.0125<br>45682 | 0.0181<br>56423 | MMP9             | 1 |
| DOID:84<br>63 | corneal ulcer       | 44587 | 5/103<br>12   | 0.0125<br>45682 | 0.0125<br>45682 | 0.0181<br>56423 | MMP9             | 1 |
| DOID:27<br>73 | contact dermatitis  | 44646 | 195/1<br>0312 | 0.0125<br>70132 | 0.0125<br>70132 | 0.0181<br>56423 | SOCS3/MMP9/PTGDR | 3 |

|         |                                 |       |        |        |        |       |                  |   |
|---------|---------------------------------|-------|--------|--------|--------|-------|------------------|---|
| DOID:41 |                                 | 195/1 | 0.0125 | 0.0125 | 0.0181 |       |                  |   |
| 38      | bile duct disease               | 44646 | 0312   | 70132  | 70132  | 56423 | ADM/F2R/HLA-DQA1 | 3 |
| DOID:38 |                                 | 68/10 | 0.0125 | 0.0125 | 0.0181 |       |                  |   |
| 29      | pituitary adenoma               | 44618 | 312    | 74362  | 74362  | 56423 | MMP9/FASLG       | 2 |
| DOID:60 |                                 | 68/10 | 0.0125 | 0.0125 | 0.0181 |       |                  |   |
| 009     | pituitary gland benign neoplasm | 44618 | 312    | 74362  | 74362  | 56423 | MMP9/FASLG       | 2 |
| DOID:97 |                                 | 197/1 | 0.0129 | 0.0129 | 0.0183 |       |                  |   |
| 41      | biliary tract disease           | 44646 | 0312   | 19927  | 19927  | 80922 | ADM/F2R/HLA-DQA1 | 3 |
| DOID:33 |                                 | 69/10 | 0.0129 | 0.0129 | 0.0183 |       |                  |   |
| 71      | chondrosarcoma                  | 44618 | 312    | 29786  | 29786  | 80922 | MMP9/F2R         | 2 |

|         |                           |       |       |        |        |        |                  |   |
|---------|---------------------------|-------|-------|--------|--------|--------|------------------|---|
| DOID:34 |                           |       | 69/10 | 0.0129 | 0.0129 | 0.0183 |                  |   |
| 07      | carotid artery disease    | 44618 | 312   | 29786  | 29786  | 80922  | MMP9/FASLG       | 2 |
| DOID:88 |                           |       | 198/1 | 0.0130 | 0.0130 | 0.0185 |                  |   |
| 57      | lupus erythematosus       | 44646 | 0312  | 9692   | 9692   | 23039  | MMP9/FASLG/PRF1  | 3 |
| DOID:35 |                           |       | 200/1 | 0.0134 | 0.0134 | 0.0189 |                  |   |
| 26      | cerebral infarction       | 44646 | 0312  | 55106  | 55106  | 32534  | NRG1/SLPI/MMP9   | 3 |
| DOID:40 |                           |       | 201/1 | 0.0136 | 0.0136 | 0.0190 |                  |   |
| 74      | pancreatic adenocarcinoma | 44646 | 0312  | 36303  | 36303  | 90095  | SOCS3/MMP9/THBS1 | 3 |
| DOID:11 |                           |       | 205/1 | 0.0143 | 0.0143 | 0.0197 |                  |   |
| 15      | sarcoma                   | 44646 | 0312  | 75154  | 75154  | 47304  | NRG1/MMP9/THBS1  | 3 |



|         |                                |       |       |        |        |        |                 |   |
|---------|--------------------------------|-------|-------|--------|--------|--------|-----------------|---|
| DOID:45 |                                |       | 74/10 | 0.0147 | 0.0147 | 0.0197 |                 |   |
| 35      | hypotrichosis                  | 44618 | 312   | 72182  | 72182  | 47304  | FASLG/HLA-DQA1  | 2 |
| DOID:55 | head and neck squamous cell    |       | 208/1 | 0.0149 | 0.0149 | 0.0197 |                 |   |
| 20      | carcinoma                      | 44646 | 0312  | 44105  | 44105  | 47304  | SOCS3/MMP9/F2R  | 3 |
| DOID:63 |                                |       | 208/1 | 0.0149 | 0.0149 | 0.0197 |                 |   |
| 0       | genetic disease                | 44646 | 0312  | 44105  | 44105  | 47304  | MMP9/THBS1/GNLY | 3 |
| DOID:00 |                                |       | 6/103 | 0.0150 | 0.0150 | 0.0197 |                 |   |
| 80177   | hepatic veno-occlusive disease | 44587 | 12    | 36592  | 36592  | 47304  | MMP9            | 1 |
| DOID:12 |                                |       | 6/103 | 0.0150 | 0.0150 | 0.0197 |                 |   |
| 42      | globe disease                  | 44587 | 12    | 36592  | 36592  | 47304  | SLPI            | 1 |

|         |                    |               |       |        |        |        |          |   |
|---------|--------------------|---------------|-------|--------|--------|--------|----------|---|
| DOID:13 |                    |               | 6/103 | 0.0150 | 0.0150 | 0.0197 |          |   |
| 714     | anodontia          |               | 44587 |        |        |        | MMP9     | 1 |
|         |                    |               | 12    | 36592  | 36592  | 47304  |          |   |
| DOID:14 | autoimmune         | polyendocrine | 6/103 | 0.0150 | 0.0150 | 0.0197 |          |   |
| 040     | syndrome           |               | 44587 |        |        |        | HLA-DQA1 | 1 |
|         |                    |               | 12    | 36592  | 36592  | 47304  |          |   |
| DOID:46 |                    |               | 6/103 | 0.0150 | 0.0150 | 0.0197 |          |   |
| 92      | endophthalmitis    |               | 44587 |        |        |        | SLPI     | 1 |
|         |                    |               | 12    | 36592  | 36592  | 47304  |          |   |
| DOID:57 | pulmonary          | sclerosing    | 6/103 | 0.0150 | 0.0150 | 0.0197 |          |   |
| 66      | hemangioma         |               | 44587 |        |        |        | MMP9     | 1 |
|         |                    |               | 12    | 36592  | 36592  | 47304  |          |   |
| DOID:64 |                    |               | 6/103 | 0.0150 | 0.0150 | 0.0197 |          |   |
| 6       | viral encephalitis |               | 44587 |        |        |        | MMP9     | 1 |
|         |                    |               | 12    | 36592  | 36592  | 47304  |          |   |

|         |                |       |       |        |        |        |               |   |
|---------|----------------|-------|-------|--------|--------|--------|---------------|---|
| DOID:84 |                |       | 6/103 | 0.0150 | 0.0150 | 0.0197 |               |   |
| 88      | polyhydramnios | 44587 | 12    | 36592  | 36592  | 47304  | AQP9          | 1 |
| DOID:86 |                |       | 6/103 | 0.0150 | 0.0150 | 0.0197 |               |   |
| 49      | tongue cancer  | 44587 | 12    | 36592  | 36592  | 47304  | KLRC1         | 1 |
| DOID:53 |                |       | 77/10 | 0.0159 | 0.0159 | 0.0208 |               |   |
| 5       | sleep disorder | 44618 | 312   | 29036  | 29036  | 20191  | MMP9/HLA-DQA1 | 2 |
| DOID:13 |                |       | 78/10 | 0.0163 | 0.0163 | 0.0212 |               |   |
| 141     | uveitis        | 44618 | 312   | 2309   | 2309   | 34606  | ADM/HLA-DQA1  | 2 |
| DOID:34 |                |       | 79/10 | 0.0167 | 0.0167 | 0.0216 |               |   |
| 51      | skin carcinoma | 44618 | 312   | 21325  | 21325  | 50543  | MMP9/THBS1    | 2 |

|         |                              |           |        |       |        |        |        |                |   |
|---------|------------------------------|-----------|--------|-------|--------|--------|--------|----------------|---|
| DOID:00 | paroxysmal                   | nocturnal |        | 7/103 | 0.0175 | 0.0175 | 0.0222 |                |   |
|         |                              |           | 44587  |       |        |        |        | HLA-DQA1       | 1 |
| 60284   | hemoglobinuria               |           |        | 12    | 2146   | 2146   | 79537  |                |   |
| DOID:00 |                              |           |        | 7/103 | 0.0175 | 0.0175 | 0.0222 |                |   |
|         | meningococcal meningitis     |           | 44587  |       |        |        |        | MMP9           | 1 |
| 80176   |                              |           |        | 12    | 2146   | 2146   | 79537  |                |   |
| DOID:58 |                              |           |        | 7/103 | 0.0175 | 0.0175 | 0.0222 |                |   |
|         | endometrioid ovary carcinoma |           | 44587  |       |        |        |        | MMP9           | 1 |
| 28      |                              |           |        | 12    | 2146   | 2146   | 79537  |                |   |
| DOID:42 |                              |           |        | 81/10 | 0.0175 | 0.0175 | 0.0222 |                |   |
|         | hair disease                 |           | 44618  |       |        |        |        | FASLG/HLA-DQA1 | 2 |
| 1       |                              |           |        | 312   | 30254  | 30254  | 79537  |                |   |
| DOID:00 | respiratory                  | system    | benign | 82/10 | 0.0179 | 0.0179 | 0.0226 |                |   |
|         |                              |           | 44618  |       |        |        |        | MMP9/FASLG     | 2 |
| 50621   | neoplasm                     |           |        | 312   | 40903  | 40903  | 96845  |                |   |

|         |                     |                  |       |        |        |        |                    |   |
|---------|---------------------|------------------|-------|--------|--------|--------|--------------------|---|
| DOID:10 |                     |                  | 83/10 | 0.0183 | 0.0183 | 0.0230 |                    |   |
| 67      | open-angle glaucoma | 44618            | 312   | 55646  | 55646  | 10427  | MMP9/FASLG         | 2 |
| DOID:34 |                     |                  | 83/10 | 0.0183 | 0.0183 | 0.0230 |                    |   |
| 5       | uterine disease     | 44618            | 312   | 55646  | 55646  | 10427  | MMP9/AQP9          | 2 |
| DOID:63 | acquired            | immunodeficiency | 85/10 | 0.0191 | 0.0191 | 0.0239 |                    |   |
| 5       | syndrome            | 44618            | 312   | 97331  | 97331  | 43702  | SLPI/FASLG         | 2 |
| DOID:10 |                     |                  | 229/1 | 0.0192 | 0.0192 | 0.0239 |                    |   |
| 36      | chronic leukemia    | 44646            | 0312  | 85482  | 85482  | 43702  | SOCS3/F2R/HLA-DQA1 | 3 |
| DOID:00 | hemophagocytic      |                  | 8/103 | 0.0200 | 0.0200 | 0.0239 |                    |   |
| 50120   | lymphohistiocytosis | 44587            | 12    | 003    | 003    | 43702  | PRF1               | 1 |

|         |                              |       |       |        |        |        |          |   |
|---------|------------------------------|-------|-------|--------|--------|--------|----------|---|
| DOID:00 | CAKUT                        | 44587 | 8/103 | 0.0200 | 0.0200 | 0.0239 | MMP9     | 1 |
| 80205   |                              |       | 12    | 003    | 003    | 43702  |          |   |
| DOID:01 | dilated cardiomyopathy 1H    | 44587 | 8/103 | 0.0200 | 0.0200 | 0.0239 | HLA-DQA1 | 1 |
| 10429   |                              |       | 12    | 003    | 003    | 43702  |          |   |
| DOID:14 | fragile X syndrome           | 44587 | 8/103 | 0.0200 | 0.0200 | 0.0239 | MMP9     | 1 |
| 261     |                              |       | 12    | 003    | 003    | 43702  |          |   |
| DOID:40 | bladder urothelial carcinoma | 44587 | 8/103 | 0.0200 | 0.0200 | 0.0239 | FASLG    | 1 |
| 06      |                              |       | 12    | 003    | 003    | 43702  |          |   |
| DOID:47 | mesangial proliferative      | 44587 | 8/103 | 0.0200 | 0.0200 | 0.0239 | PDGFD    | 1 |
| 83      | glomerulonephritis           |       | 12    | 003    | 003    | 43702  |          |   |

|         |                       |       |       |        |        |        |              |   |
|---------|-----------------------|-------|-------|--------|--------|--------|--------------|---|
| DOID:49 |                       |       | 8/103 | 0.0200 | 0.0200 | 0.0239 |              |   |
| 5       | sclerosing hemangioma | 44587 | 12    | 003    | 003    | 43702  | MMP9         | 1 |
| DOID:84 |                       |       | 8/103 | 0.0200 | 0.0200 | 0.0239 |              |   |
| 40      | ileus                 | 44587 | 12    | 003    | 003    | 43702  | MMP9         | 1 |
| DOID:34 |                       |       | 87/10 | 0.0200 | 0.0200 | 0.0239 |              |   |
| 80      | uveal disease         | 44618 | 312   | 55135  | 55135  | 43702  | ADM/HLA-DQA1 | 2 |
| DOID:63 |                       |       | 88/10 | 0.0204 | 0.0204 | 0.0243 |              |   |
| 64      | migraine              | 44618 | 312   | 90029  | 90029  | 57475  | ADM/MMP9     | 2 |
| DOID:10 |                       |       | 90/10 | 0.0213 | 0.0213 | 0.0252 |              |   |
| 579     | leukodystrophy        | 44618 | 312   | 71693  | 71693  | 96515  | ADM/MMP9     | 2 |

|         |                                |       |        |        |        |       |                |   |
|---------|--------------------------------|-------|--------|--------|--------|-------|----------------|---|
| DOID:10 |                                | 92/10 | 0.0222 | 0.0222 | 0.0253 |       |                |   |
| 608     | celiac disease                 | 44618 | 312    | 69054  | 69054  | 63193 | FASLG/HLA-DQA1 | 2 |
| DOID:00 |                                | 9/103 | 0.0224 | 0.0224 | 0.0253 |       |                |   |
| 50697   | chorioamnionitis               | 44587 | 12     | 73125  | 73125  | 63193 | MMP9           | 1 |
| DOID:10 |                                | 9/103 | 0.0224 | 0.0224 | 0.0253 |       |                |   |
| 456     | tonsillitis                    | 44587 | 12     | 73125  | 73125  | 63193 | FASLG          | 1 |
| DOID:12 |                                | 9/103 | 0.0224 | 0.0224 | 0.0253 |       |                |   |
| 510     | retinal ischemia               | 44587 | 12     | 73125  | 73125  | 63193 | MMP9           | 1 |
| DOID:14 |                                | 9/103 | 0.0224 | 0.0224 | 0.0253 |       |                |   |
| 05      | primary angle-closure glaucoma | 44587 | 12     | 73125  | 73125  | 63193 | MMP9           | 1 |



|         |                                |            |       |        |        |        |       |   |
|---------|--------------------------------|------------|-------|--------|--------|--------|-------|---|
| DOID:19 |                                |            | 9/103 | 0.0224 | 0.0224 | 0.0253 |       |   |
| 96      | rectum adenocarcinoma          | 44587      | 12    | 73125  | 73125  | 63193  | MMP9  | 1 |
| DOID:38 |                                |            | 9/103 | 0.0224 | 0.0224 | 0.0253 |       |   |
| 92      | insulinoma                     | 44587      | 12    | 73125  | 73125  | 63193  | ADM   | 1 |
| DOID:51 |                                |            | 9/103 | 0.0224 | 0.0224 | 0.0253 |       |   |
| 19      | ovarian cyst                   | 44587      | 12    | 73125  | 73125  | 63193  | MMP9  | 1 |
| DOID:66 | autoimmune lymphoproliferative |            | 9/103 | 0.0224 | 0.0224 | 0.0253 |       |   |
| 88      | syndrome                       | 44587      | 12    | 73125  | 73125  | 63193  | FASLG | 1 |
| DOID:89 | subacute                       | sclerosing | 9/103 | 0.0224 | 0.0224 | 0.0253 |       |   |
| 70      | panencephalitis                | 44587      | 12    | 73125  | 73125  | 63193  | MMP9  | 1 |

|         |                        |          |       |       |        |        |        |                    |   |
|---------|------------------------|----------|-------|-------|--------|--------|--------|--------------------|---|
| DOID:98 |                        |          |       | 9/103 | 0.0224 | 0.0224 | 0.0253 |                    |   |
| 40      | esotropia              |          | 44587 | 12    | 73125  | 73125  | 63193  | MMP9               | 1 |
| DOID:83 |                        |          |       | 243/1 | 0.0225 | 0.0225 | 0.0253 |                    |   |
| 98      | osteoarthritis         |          | 44646 | 0312  | 31616  | 31616  | 63193  | MMP9/FASLG/TGFBR3  | 3 |
| DOID:37 | cervical               | squamous | cell  | 93/10 | 0.0227 | 0.0227 | 0.0254 |                    |   |
| 44      | carcinoma              |          | 44618 | 312   | 23569  | 23569  | 75289  | SOCS3/MMP9         | 2 |
| DOID:11 |                        |          |       | 246/1 | 0.0232 | 0.0232 | 0.0259 |                    |   |
| 054     | urinary bladder cancer |          | 44646 | 0312  | 64059  | 64059  | 75638  | MMP9/FASLG/THBS1   | 3 |
| DOID:57 |                        |          |       | 247/1 | 0.0235 | 0.0235 | 0.0261 |                    |   |
| 6       | proteinuria            |          | 44646 | 0312  | 11102  | 11102  | 45622  | ADM/THBS1/HLA-DQA1 | 3 |

|         |                               |       |       |        |        |        |                  |   |
|---------|-------------------------------|-------|-------|--------|--------|--------|------------------|---|
| DOID:27 |                               |       | 248/1 | 0.0237 | 0.0237 | 0.0263 |                  |   |
| 23      | dermatitis                    | 44646 | 0312  | 59591  | 59591  | 15844  | SOCS3/MMP9/PTGDR | 3 |
| DOID:38 |                               |       | 97/10 | 0.0245 | 0.0245 | 0.0266 |                  |   |
| 1       | arthropathy                   | 44618 | 312   | 80031  | 80031  | 59596  | SLPI/MMP9        | 2 |
| DOID:00 | primary progressive multiple  |       | 10/10 | 0.0249 | 0.0249 | 0.0266 |                  |   |
| 50784   | sclerosis                     | 44587 | 312   | 3995   | 3995   | 59596  | MMP9             | 1 |
| DOID:00 |                               |       | 10/10 | 0.0249 | 0.0249 | 0.0266 |                  |   |
| 80883   | vitamin D-dependent rickets   | 44587 | 312   | 3995   | 3995   | 59596  | CXCL5            | 1 |
| DOID:13 |                               |       | 10/10 | 0.0249 | 0.0249 | 0.0266 |                  |   |
| 317     | hyperinsulinemic hypoglycemia | 44587 | 312   | 3995   | 3995   | 59596  | TGFBR3           | 1 |

|               |                                |       |              |                |                |                 |       |   |
|---------------|--------------------------------|-------|--------------|----------------|----------------|-----------------|-------|---|
| DOID:18<br>03 | neuritis                       | 44587 | 10/10<br>312 | 0.0249<br>3995 | 0.0249<br>3995 | 0.0266<br>59596 | FASLG | 1 |
| DOID:42<br>33 | clear cell sarcoma             | 44587 | 10/10<br>312 | 0.0249<br>3995 | 0.0249<br>3995 | 0.0266<br>59596 | NRG1  | 1 |
| DOID:44<br>18 | cutaneous fibrous histiocytoma | 44587 | 10/10<br>312 | 0.0249<br>3995 | 0.0249<br>3995 | 0.0266<br>59596 | MMP9  | 1 |
| DOID:46<br>44 | epidermolysis bullosa simplex  | 44587 | 10/10<br>312 | 0.0249<br>3995 | 0.0249<br>3995 | 0.0266<br>59596 | MMP9  | 1 |
| DOID:96<br>51 | systolic heart failure         | 44587 | 10/10<br>312 | 0.0249<br>3995 | 0.0249<br>3995 | 0.0266<br>59596 | MMP9  | 1 |

|         |                               |       |       |        |        |        |               |   |
|---------|-------------------------------|-------|-------|--------|--------|--------|---------------|---|
| DOID:40 |                               |       | 101/1 | 0.0264 | 0.0264 | 0.0282 |               |   |
| 79      | heart valve disease           | 44618 | 0312  | 96955  | 96955  | 146    | MMP9/HLA-DQA1 | 2 |
| DOID:53 | pituitary gland disease       | 44618 | 102/1 | 0.0269 | 0.0269 | 0.0282 |               |   |
|         |                               |       | 0312  | 8548   | 8548   | 76327  | MMP9/FASLG    | 2 |
| DOID:00 | autoimmune disease of central |       | 11/10 | 0.0274 | 0.0274 | 0.0282 |               |   |
| 60004   | nervous system                | 44587 | 312   | 00789  | 00789  | 76327  | MMP9          | 1 |
| DOID:39 | pancreatic cystadenoma        | 44587 | 11/10 | 0.0274 | 0.0274 | 0.0282 |               |   |
| 18      |                               |       | 312   | 00789  | 00789  | 76327  | ADM           | 1 |
| DOID:85 | chronic ulcer of skin         | 44587 | 11/10 | 0.0274 | 0.0274 | 0.0282 |               |   |
| 49      |                               |       | 312   | 00789  | 00789  | 76327  | MMP9          | 1 |

|         |                          |       |       |        |        |        |                |   |
|---------|--------------------------|-------|-------|--------|--------|--------|----------------|---|
| DOID:85 |                          |       | 11/10 | 0.0274 | 0.0274 | 0.0282 |                |   |
| 68      | infectious mononucleosis | 44587 | 312   | 00789  | 00789  | 76327  | FASLG          | 1 |
| DOID:85 |                          |       | 11/10 | 0.0274 | 0.0274 | 0.0282 |                |   |
| 74      | lichen disease           | 44587 | 312   | 00789  | 00789  | 76327  | MMP9           | 1 |
| DOID:88 |                          |       | 11/10 | 0.0274 | 0.0274 | 0.0282 |                |   |
| 69      | neuromyelitis optica     | 44587 | 312   | 00789  | 00789  | 76327  | MMP9           | 1 |
| DOID:92 |                          |       | 11/10 | 0.0274 | 0.0274 | 0.0282 |                |   |
| 01      | lichen planus            | 44587 | 312   | 00789  | 00789  | 76327  | MMP9           | 1 |
| DOID:12 |                          |       | 103/1 | 0.0274 | 0.0274 | 0.0282 |                |   |
| 361     | Graves' disease          | 44618 | 0312  | 77683  | 77683  | 76327  | FASLG/HLA-DQA1 | 2 |

|                  |                             |       |               |                 |                 |                 |                         |   |
|------------------|-----------------------------|-------|---------------|-----------------|-----------------|-----------------|-------------------------|---|
| DOID:94<br>08    | acute myocardial infarction | 44618 | 105/1<br>0312 | 0.0284<br>73038 | 0.0284<br>73038 | 0.0290<br>90709 | MMP9/PRF1               | 2 |
| DOID:40<br>3     | mouth disease               | 44646 | 266/1<br>0312 | 0.0284<br>80026 | 0.0284<br>80026 | 0.0290<br>90709 | ADM/SLPI/MMP9           | 3 |
| DOID:44<br>50    | renal cell carcinoma        | 44677 | 472/1<br>0312 | 0.0291<br>23064 | 0.0291<br>23064 | 0.0295<br>12098 | MMP9/FASLG/THBS1/TGFBR3 | 4 |
| DOID:87<br>0     | neuropathy                  | 44677 | 472/1<br>0312 | 0.0291<br>23064 | 0.0291<br>23064 | 0.0295<br>12098 | S100A12/NRG1/MMP9/FASLG | 4 |
| DOID:00<br>80745 | polymyositis                | 44587 | 12/10<br>312  | 0.0298<br>55655 | 0.0298<br>55655 | 0.0295<br>12098 | MMP9                    | 1 |

|         |                             |       |       |        |        |        |          |   |
|---------|-----------------------------|-------|-------|--------|--------|--------|----------|---|
| DOID:10 |                             |       | 12/10 | 0.0298 | 0.0298 | 0.0295 |          |   |
| 80      | filariasis                  | 44587 | 312   | 55655  | 55655  | 12098  | HLA-DQA1 | 1 |
| DOID:14 |                             |       | 12/10 | 0.0298 | 0.0298 | 0.0295 |          |   |
| 256     | adult-onset Still's disease | 44587 | 312   | 55655  | 55655  | 12098  | FASLG    | 1 |
| DOID:15 |                             |       | 12/10 | 0.0298 | 0.0298 | 0.0295 |          |   |
| 86      | rheumatic fever             | 44587 | 312   | 55655  | 55655  | 12098  | HLA-DQA1 | 1 |
| DOID:89 |                             |       | 12/10 | 0.0298 | 0.0298 | 0.0295 |          |   |
| 86      | narcolepsy                  | 44587 | 312   | 55655  | 55655  | 12098  | HLA-DQA1 | 1 |
| DOID:91 |                             |       | 12/10 | 0.0298 | 0.0298 | 0.0295 |          |   |
| 64      | achalasia                   | 44587 | 312   | 55655  | 55655  | 12098  | HLA-DQA1 | 1 |



|         |                           |       |       |        |        |        |                      |   |
|---------|---------------------------|-------|-------|--------|--------|--------|----------------------|---|
| DOID:99 |                           |       | 12/10 | 0.0298 | 0.0298 | 0.0295 |                      |   |
| 65      | toxoplasmosis             | 44587 | 312   | 55655  | 55655  | 12098  | HLA-DQA1             | 1 |
| DOID:00 |                           |       | 480/1 | 0.0307 | 0.0307 | 0.0302 |                      |   |
| 60084   | cell type benign neoplasm | 44677 | 0312  | 32224  | 32224  | 70085  | ADM/MMP9/FASLG/THBS1 | 4 |
| DOID:10 |                           |       | 110/1 | 0.0310 | 0.0310 | 0.0303 |                      |   |
| 124     | corneal disease           | 44618 | 0312  | 24379  | 24379  | 41125  | SLPI/MMP9            | 2 |
| DOID:87 |                           |       | 110/1 | 0.0310 | 0.0310 | 0.0303 |                      |   |
| 78      | Crohn's disease           | 44618 | 0312  | 24379  | 24379  | 41125  | S100A12/PRF1         | 2 |
| DOID:15 |                           |       | 111/1 | 0.0315 | 0.0315 | 0.0306 |                      |   |
| 64      | fungal infectious disease | 44618 | 0312  | 45281  | 45281  | 16009  | SLPI/MMP9            | 2 |

|         |                              |             |             |       |        |        |        |          |   |
|---------|------------------------------|-------------|-------------|-------|--------|--------|--------|----------|---|
| DOID:00 | aspirin-induced              | respiratory |             | 13/10 | 0.0323 | 0.0323 | 0.0306 |          |   |
|         |                              |             | 44587       |       |        |        |        | HLA-DQA1 | 1 |
| 80822   | disease                      |             |             | 312   | 04563  | 04563  | 16009  |          |   |
| DOID:10 |                              |             |             | 13/10 | 0.0323 | 0.0323 | 0.0306 |          |   |
|         | lepomatous leprosy           |             | 44587       |       |        |        |        | HLA-DQA1 | 1 |
| 887     |                              |             |             | 312   | 04563  | 04563  | 16009  |          |   |
| DOID:12 |                              |             |             | 13/10 | 0.0323 | 0.0323 | 0.0306 |          |   |
|         | Vogt-Koyanagi-Harada disease |             | 44587       |       |        |        |        | HLA-DQA1 | 1 |
| 297     |                              |             |             | 312   | 04563  | 04563  | 16009  |          |   |
| DOID:13 | persistent                   | fetal       | circulation |       | 13/10  | 0.0323 | 0.0323 | 0.0306   |   |
|         |                              |             | 44587       |       |        |        |        | ADM      | 1 |
| 042     | syndrome                     |             |             | 312   | 04563  | 04563  | 16009  |          |   |
| DOID:13 |                              |             |             | 13/10 | 0.0323 | 0.0323 | 0.0306 |          |   |
|         | obstructive jaundice         |             | 44587       |       |        |        |        | ADM      | 1 |
| 603     |                              |             |             | 312   | 04563  | 04563  | 16009  |          |   |

|         |                             |       |       |        |        |        |               |   |
|---------|-----------------------------|-------|-------|--------|--------|--------|---------------|---|
| DOID:20 |                             |       | 13/10 | 0.0323 | 0.0323 | 0.0306 |               |   |
| 89      | constipation                | 44587 | 312   | 04563  | 04563  | 16009  | AQP9          | 1 |
| DOID:29 |                             |       | 13/10 | 0.0323 | 0.0323 | 0.0306 |               |   |
| 88      | antiphospholipid syndrome   | 44587 | 312   | 04563  | 04563  | 16009  | HLA-DQA1      | 1 |
| DOID:97 |                             |       | 13/10 | 0.0323 | 0.0323 | 0.0306 |               |   |
| 79      | bowel dysfunction           | 44587 | 312   | 04563  | 04563  | 16009  | AQP9          | 1 |
| DOID:00 |                             |       | 114/1 | 0.0331 | 0.0331 | 0.0311 |               |   |
| 60060   | non-Hodgkin lymphoma        | 44618 | 0312  | 28902  | 28902  | 82943  | PRF1/HLA-DQA1 | 2 |
| DOID:34 |                             |       | 114/1 | 0.0331 | 0.0331 | 0.0311 |               |   |
| 1       | peripheral vascular disease | 44618 | 0312  | 28902  | 28902  | 82943  | ADM/FASLG     | 2 |

|         |                            |       |        |        |        |       |                          |   |
|---------|----------------------------|-------|--------|--------|--------|-------|--------------------------|---|
| DOID:34 |                            | 493/1 | 0.0334 | 0.0334 | 0.0313 |       |                          |   |
| 59      | breast carcinoma           | 44677 | 0312   | 59675  | 59675  | 87164 | SOCS3/MMP9/FASLG/F2R     | 4 |
| DOID:11 |                            | 116/1 | 0.0342 | 0.0342 | 0.0314 |       |                          |   |
| 335     | sarcoidosis                | 44618 | 0312   | 01884  | 01884  | 19679 | CXCL5/HLA-DQA1           | 2 |
| DOID:42 |                            | 498/1 | 0.0345 | 0.0345 | 0.0314 |       |                          |   |
| 3       | myopathy                   | 44677 | 0312   | 46018  | 46018  | 19679 | MMP9/THBS1/CBLB/HLA-DQA1 | 4 |
| DOID:11 |                            | 14/10 | 0.0347 | 0.0347 | 0.0314 |       |                          |   |
| 294     | arteriovenous malformation | 44587 | 312    | 47527  | 47527  | 19679 | MMP9                     | 1 |
| DOID:12 |                            | 14/10 | 0.0347 | 0.0347 | 0.0314 |       |                          |   |
| 1       | vaginal disease            | 44587 | 312    | 47527  | 47527  | 19679 | PI3                      | 1 |

|         |                           |       |       |        |        |        |          |   |
|---------|---------------------------|-------|-------|--------|--------|--------|----------|---|
| DOID:16 |                           |       | 14/10 | 0.0347 | 0.0347 | 0.0314 |          |   |
| 57      | ventricular septal defect | 44587 | 312   | 47527  | 47527  | 19679  | MMP9     | 1 |
| DOID:21 |                           |       | 14/10 | 0.0347 | 0.0347 | 0.0314 |          |   |
| 13      | coccidiosis               | 44587 | 312   | 47527  | 47527  | 19679  | HLA-DQA1 | 1 |
| DOID:21 |                           |       | 14/10 | 0.0347 | 0.0347 | 0.0314 |          |   |
| 70      | vaginitis                 | 44587 | 312   | 47527  | 47527  | 19679  | PI3      | 1 |
| DOID:33 |                           |       | 14/10 | 0.0347 | 0.0347 | 0.0314 |          |   |
| 85      | bacterial vaginosis       | 44587 | 312   | 47527  | 47527  | 19679  | PI3      | 1 |
| DOID:57 |                           |       | 14/10 | 0.0347 | 0.0347 | 0.0314 |          |   |
| 1       | median neuropathy         | 44587 | 312   | 47527  | 47527  | 19679  | NRG1     | 1 |

|         |                                |       |       |        |        |        |              |   |
|---------|--------------------------------|-------|-------|--------|--------|--------|--------------|---|
| DOID:57 | mononeuritis of upper limb and | 44587 | 14/10 | 0.0347 | 0.0347 | 0.0314 |              |   |
| 2       | mononeuritis multiplex         |       | 312   | 47527  | 47527  | 19679  | NRG1         | 1 |
| DOID:58 | hemoglobinuria                 | 44587 | 14/10 | 0.0347 | 0.0347 | 0.0314 |              |   |
| 2       |                                |       | 312   | 47527  | 47527  | 19679  | HLA-DQA1     | 1 |
| DOID:37 | gastric adenocarcinoma         | 44618 | 119/1 | 0.0358 | 0.0358 | 0.0322 |              |   |
| 17      |                                |       | 0312  | 36826  | 36826  | 98756  | F2R/HLA-DQA1 | 2 |
| DOID:11 | sciatic neuropathy             | 44618 | 120/1 | 0.0363 | 0.0363 | 0.0326 |              |   |
| 446     |                                |       | 0312  | 88522  | 88522  | 89157  | NRG1/MMP9    | 2 |
| DOID:00 | brain glioma                   | 44587 | 15/10 | 0.0371 | 0.0371 | 0.0330 |              |   |
| 60108   |                                |       | 312   | 8456   | 8456   | 81     | FASLG        | 1 |

|         |                        |       |       |        |        |        |                |   |
|---------|------------------------|-------|-------|--------|--------|--------|----------------|---|
| DOID:31 | keratoacanthoma        | 44587 | 15/10 | 0.0371 | 0.0371 | 0.0330 | THBS1          | 1 |
| 49      |                        |       | 312   | 8456   | 8456   | 81     |                |   |
| DOID:84 | intestinal obstruction | 44587 | 15/10 | 0.0371 | 0.0371 | 0.0330 | MMP9           | 1 |
| 37      |                        |       | 312   | 8456   | 8456   | 81     |                |   |
| DOID:00 | autoimmune disease of  | 44618 | 122/1 | 0.0375 | 0.0375 | 0.0331 | FASLG/HLA-DQA1 | 2 |
| 60005   | endocrine system       |       | 0312  | 01873  | 01873  | 49429  |                |   |
| DOID:34 | pancreatic ductal      | 44618 | 122/1 | 0.0375 | 0.0375 | 0.0331 | SOCS3/MMP9     | 2 |
| 98      | adenocarcinoma         |       | 0312  | 01873  | 01873  | 49429  |                |   |
| DOID:00 | autoimmune disease of  | 44618 | 123/1 | 0.0380 | 0.0380 | 0.0332 | FASLG/HLA-DQA1 | 2 |
| 60031   | gastrointestinal tract |       | 0312  | 63491  | 63491  | 19969  |                |   |

|         |                            |       |       |        |        |        |            |   |
|---------|----------------------------|-------|-------|--------|--------|--------|------------|---|
| DOID:12 |                            |       | 123/1 | 0.0380 | 0.0380 | 0.0332 |            |   |
| 528     | lesion of sciatic nerve    | 44618 | 0312  | 63491  | 63491  | 19969  | NRG1/MMP9  | 2 |
| DOID:18 |                            |       | 123/1 | 0.0380 | 0.0380 | 0.0332 |            |   |
| 24      | status epilepticus         | 44618 | 0312  | 63491  | 63491  | 19969  | SOCS3/MMP9 | 2 |
| DOID:94 |                            |       | 123/1 | 0.0380 | 0.0380 | 0.0332 |            |   |
| 73      | mononeuritis of lower limb | 44618 | 0312  | 63491  | 63491  | 19969  | NRG1/MMP9  | 2 |
| DOID:22 |                            |       | 124/1 | 0.0386 | 0.0386 | 0.0335 |            |   |
| 18      | blood platelet disease     | 44618 | 0312  | 28378  | 28378  | 00944  | F2R/THBS1  | 2 |
| DOID:44 |                            |       | 124/1 | 0.0386 | 0.0386 | 0.0335 |            |   |
| 48      | macular degeneration       | 44618 | 0312  | 28378  | 28378  | 00944  | MMP9/RORA  | 2 |



|         |                                |       |       |        |        |        |           |   |
|---------|--------------------------------|-------|-------|--------|--------|--------|-----------|---|
| DOID:00 | gastrointestinal system benign | 44618 | 125/1 | 0.0391 | 0.0391 | 0.0338 |           |   |
| 50624   | neoplasm                       |       | 0312  | 96517  | 96517  | 87106  | ADM/FASLG | 2 |
| DOID:00 | biliary tract benign neoplasm  | 44587 | 16/10 | 0.0396 | 0.0396 | 0.0340 |           |   |
| 50625   |                                |       | 312   | 15676  | 15676  | 36095  | FASLG     | 1 |
| DOID:11 | primary hyperparathyroidism    | 44587 | 16/10 | 0.0396 | 0.0396 | 0.0340 |           |   |
| 202     |                                |       | 312   | 15676  | 15676  | 36095  | ADM       | 1 |
| DOID:11 | hypertrophic cardiomyopathy    | 44618 | 127/1 | 0.0403 | 0.0403 | 0.0345 |           |   |
| 984     |                                |       | 0312  | 42472  | 42472  | 52886  | ADM/MMP9  | 2 |
| DOID:10 | pelvic inflammatory disease    | 44587 | 17/10 | 0.0420 | 0.0420 | 0.0356 |           |   |
| 03      |                                |       | 312   | 40889  | 40889  | 03343  | MMP9      | 1 |

|         |                             |       |       |        |        |        |             |   |
|---------|-----------------------------|-------|-------|--------|--------|--------|-------------|---|
| DOID:10 |                             |       | 17/10 | 0.0420 | 0.0420 | 0.0356 |             |   |
| 964     | cholesteatoma of middle ear | 44587 | 312   | 40889  | 40889  | 03343  | MMP9        | 1 |
| DOID:89 |                             |       | 17/10 | 0.0420 | 0.0420 | 0.0356 |             |   |
| 29      | atrophic gastritis          | 44587 | 312   | 40889  | 40889  | 03343  | FASLG       | 1 |
| DOID:30 |                             |       | 130/1 | 0.0420 | 0.0420 | 0.0356 |             |   |
| 68      | glioblastoma                | 44618 | 0312  | 85326  | 85326  | 03343  | MMP9/AQP9   | 2 |
| DOID:85 |                             |       | 132/1 | 0.0432 | 0.0432 | 0.0364 |             |   |
| 77      | ulcerative colitis          | 44618 | 0312  | 62962  | 62962  | 87674  | SOCS3/FASLG | 2 |
| DOID:11 |                             |       | 18/10 | 0.0444 | 0.0444 | 0.0368 |             |   |
| 729     | Lyme disease                | 44587 | 312   | 60212  | 60212  | 21797  | MMP9        | 1 |

|         |                         |       |       |        |        |        |       |   |
|---------|-------------------------|-------|-------|--------|--------|--------|-------|---|
| DOID:12 |                         |       | 18/10 | 0.0444 | 0.0444 | 0.0368 |       |   |
| 337     | varicocele              | 44587 | 312   | 60212  | 60212  | 21797  | FASLG | 1 |
| DOID:13 |                         |       | 18/10 | 0.0444 | 0.0444 | 0.0368 |       |   |
| 550     | angle-closure glaucoma  | 44587 | 312   | 60212  | 60212  | 21797  | MMP9  | 1 |
| DOID:91 |                         |       | 18/10 | 0.0444 | 0.0444 | 0.0368 |       |   |
| 11      | cutaneous leishmaniasis | 44587 | 312   | 60212  | 60212  | 21797  | FASLG | 1 |
| DOID:95 |                         |       | 18/10 | 0.0444 | 0.0444 | 0.0368 |       |   |
| 63      | bronchiectasis          | 44587 | 312   | 60212  | 60212  | 21797  | MMP9  | 1 |
| DOID:97 |                         |       | 18/10 | 0.0444 | 0.0444 | 0.0368 |       |   |
| 42      | pelvic varices          | 44587 | 312   | 60212  | 60212  | 21797  | FASLG | 1 |

|         |                       |       |       |        |        |        |                     |   |
|---------|-----------------------|-------|-------|--------|--------|--------|---------------------|---|
| DOID:23 | brain ischemia        | 44646 | 318/1 | 0.0447 | 0.0447 | 0.0369 | MMP9/FASLG/F2R      | 3 |
| 16      |                       |       | 0312  | 35834  | 35834  | 39138  |                     |   |
| DOID:23 | anemia                | 44646 | 319/1 | 0.0450 | 0.0450 | 0.0371 | FASLG/PRF1/HLA-DQA1 | 3 |
| 55      |                       |       | 0312  | 86074  | 86074  | 17208  |                     |   |
| DOID:11 | osteoporosis          | 44618 | 136/1 | 0.0456 | 0.0456 | 0.0372 | MMP9/THBS1          | 2 |
| 476     |                       |       | 0312  | 5534   | 5534   | 52255  |                     |   |
| DOID:18 | mononeuritis          | 44618 | 136/1 | 0.0456 | 0.0456 | 0.0372 | NRG1/MMP9           | 2 |
| 02      |                       |       | 0312  | 5534   | 5534   | 52255  |                     |   |
| DOID:28 | endometrial carcinoma | 44618 | 136/1 | 0.0456 | 0.0456 | 0.0372 | MMP9/TGFBR3         | 2 |
| 71      |                       |       | 0312  | 5534   | 5534   | 52255  |                     |   |

|         |                                  |       |       |        |        |        |                   |   |
|---------|----------------------------------|-------|-------|--------|--------|--------|-------------------|---|
| DOID:00 |                                  |       | 137/1 | 0.0462 | 0.0462 | 0.0374 |                   |   |
| 80011   | bone resorption disease          | 44618 | 0312  | 61061  | 61061  | 14409  | MMP9/THBS1        | 2 |
| DOID:10 |                                  |       | 137/1 | 0.0462 | 0.0462 | 0.0374 |                   |   |
| 825     | essential hypertension           | 44618 | 0312  | 61061  | 61061  | 14409  | ADM/MMP9          | 2 |
| DOID:11 |                                  |       | 137/1 | 0.0462 | 0.0462 | 0.0374 |                   |   |
| 88      | mononeuropathy                   | 44618 | 0312  | 61061  | 61061  | 14409  | NRG1/MMP9         | 2 |
| DOID:48 | male reproductive system disease | 44646 | 324/1 | 0.0468 | 0.0468 | 0.0374 | FASLG/PDGFD/CXCL5 | 3 |
| DOID:86 |                                  |       | 138/1 | 0.0468 | 0.0468 | 0.0374 |                   |   |
| 18      | oral cavity cancer               | 44618 | 0312  | 69796  | 69796  | 70325  | MMP9/KLRC1        | 2 |

|         |                               |               |       |        |        |        |            |   |
|---------|-------------------------------|---------------|-------|--------|--------|--------|------------|---|
| DOID:00 |                               |               | 19/10 | 0.0468 | 0.0468 | 0.0374 |            |   |
| 50548   | hereditary sensory neuropathy | 44587         | 312   | 7366   | 7366   | 70325  | S100A12    | 1 |
| DOID:14 |                               |               | 19/10 | 0.0468 | 0.0468 | 0.0374 |            |   |
| 654     | prostatitis                   | 44587         | 312   | 7366   | 7366   | 70325  | CXCL5      | 1 |
| DOID:00 |                               |               | 139/1 | 0.0474 | 0.0474 | 0.0377 |            |   |
| 60122   | integumentary system cancer   | 44618         | 0312  | 81527  | 81527  | 3748   | MMP9/THBS1 | 2 |
| DOID:41 |                               |               | 139/1 | 0.0474 | 0.0474 | 0.0377 |            |   |
| 59      | skin cancer                   | 44618         | 0312  | 81527  | 81527  | 3748   | MMP9/THBS1 | 2 |
| DOID:13 | acute                         | proliferative | 20/10 | 0.0492 | 0.0492 | 0.0377 |            |   |
| 138     | glomerulonephritis            | 44587         | 312   | 81247  | 81247  | 94287  | MMP9       | 1 |

|         |                               |          |       |        |        |        |      |   |
|---------|-------------------------------|----------|-------|--------|--------|--------|------|---|
| DOID:13 |                               |          | 20/10 | 0.0492 | 0.0492 | 0.0377 |      |   |
| 139     | crescentic glomerulonephritis | 44587    | 312   | 81247  | 81247  | 94287  | MMP9 | 1 |
| DOID:23 | relapsing-remitting           | multiple | 20/10 | 0.0492 | 0.0492 | 0.0377 |      |   |
| 78      | sclerosis                     | 44587    | 312   | 81247  | 81247  | 94287  | MMP9 | 1 |
| DOID:29 | membranoproliferative         |          | 20/10 | 0.0492 | 0.0492 | 0.0377 |      |   |
| 20      | glomerulonephritis            | 44587    | 312   | 81247  | 81247  | 94287  | PRF1 | 1 |
| DOID:33 |                               |          | 20/10 | 0.0492 | 0.0492 | 0.0377 |      |   |
| 02      | chordoma                      | 44587    | 312   | 81247  | 81247  | 94287  | MMP9 | 1 |
| DOID:33 |                               |          | 20/10 | 0.0492 | 0.0492 | 0.0377 |      |   |
| 03      | notochordal cancer            | 44587    | 312   | 81247  | 81247  | 94287  | MMP9 | 1 |

|         |                              |       |       |        |        |        |            |   |
|---------|------------------------------|-------|-------|--------|--------|--------|------------|---|
| DOID:46 |                              |       | 20/10 | 0.0492 | 0.0492 | 0.0377 |            |   |
| 77      | keratitis                    | 44587 | 312   | 81247  | 81247  | 94287  | MMP9       | 1 |
| DOID:91 |                              |       | 20/10 | 0.0492 | 0.0492 | 0.0377 |            |   |
| 82      | pemphigus                    | 44587 | 312   | 81247  | 81247  | 94287  | HLA-DQA1   | 1 |
| DOID:92 |                              |       | 20/10 | 0.0492 | 0.0492 | 0.0377 |            |   |
| 82      | ocular hypertension          | 44587 | 312   | 81247  | 81247  | 94287  | MMP9       | 1 |
| DOID:93 |                              |       | 20/10 | 0.0492 | 0.0492 | 0.0377 |            |   |
| 60      | intrinsic asthma             | 44587 | 312   | 81247  | 81247  | 94287  | HLA-DQA1   | 1 |
| DOID:00 |                              |       | 142/1 | 0.0493 | 0.0493 | 0.0377 |            |   |
| 80524   | thyroid gland adenocarcinoma | 44618 | 0312  | 34528  | 34528  | 94287  | MMP9/THBS1 | 2 |



|         |                              |       |       |        |        |        |            |   |
|---------|------------------------------|-------|-------|--------|--------|--------|------------|---|
| DOID:00 | differentiated thyroid gland | 44618 | 142/1 | 0.0493 | 0.0493 | 0.0377 | MMP9/THBS1 | 2 |
| 80525   | carcinoma                    |       | 0312  | 34528  | 34528  | 94287  |            |   |
| DOID:12 | Huntington's disease         | 44618 | 142/1 | 0.0493 | 0.0493 | 0.0377 | MMP9/FASLG | 2 |
| 858     |                              |       | 0312  | 34528  | 34528  | 94287  |            |   |

**Table S2:** Results for the ingenuity pathway analysis (IPA) of biomarkers;

| Ingenuity Canonical Pathways               | -log(p-value) | Ratio | z-score | Molecules                                            |
|--------------------------------------------|---------------|-------|---------|------------------------------------------------------|
|                                            |               | 0.01  | -1.63   |                                                      |
| CTLA4 Signaling in Cytotoxic T Lymphocytes | 1.66          | 61    | 3       | CBLB,HLA-DQA1,TRDV3,TRGC2,TRGV9,YES1                 |
| Pathogen Induced Cytokine Storm Signaling  | 3.76          | 0.02  | 0.333   | CXCL5,FASLG,GZMB,HLA-DQA1,PRF1,SOCS3,TBX21,TLR5,XCL1 |

|                                         |      |    |       |                                                            |  |
|-----------------------------------------|------|----|-------|------------------------------------------------------------|--|
| Pathway                                 |      | 65 |       |                                                            |  |
|                                         |      |    | 0.02  |                                                            |  |
| ID1 Signaling Pathway                   | 2.2  | 5  | 0.447 | CDKN1C,GSPT1,MMP9,TGFBR3,YES1                              |  |
|                                         |      |    | 0.01  |                                                            |  |
| Neuroinflammation Signaling Pathway     | 1.47 | 63 | 0.447 | FASLG,HLA-DQA1,MMP9,TGFBR3,TLR5                            |  |
| Pulmonary Fibrosis Idiopathic Signaling |      |    | 0.01  |                                                            |  |
| Pathway                                 | 1.94 | 86 | 0.816 | ADAMTS1,F2R,MMP9,PDGFD,TGFBR3,THBS1                        |  |
|                                         |      |    | 0.03  |                                                            |  |
| Natural Killer Cell Signaling           | 3.86 | 63 | 1     | FASLG,IL2RB,KLRB1,KLRC1,KLRC2,KLRC3,KLRD1                  |  |
|                                         |      |    | 0.01  |                                                            |  |
| Breast Cancer Regulation by Stathmin1   | 1.68 | 37 | 1.414 | ADGRG1,AVPR1A,F2R,MMP9,P2RY12,PTGDR,S1PR5,TUBB1            |  |
|                                         |      |    | 0.01  | ADGRG1,ATP5F1C,AVPR1A,F2R,FCGR1BP,MMP9,P2RY12,PTGDR,S100A1 |  |
| S100 Family Signaling Pathway           | 2.36 | 47 | 1.508 | 2,S1PR5,SMAD7                                              |  |

|                                           |      |      |       |                                                            |  |
|-------------------------------------------|------|------|-------|------------------------------------------------------------|--|
| Crosstalk between Dendritic Cells and     |      | 0.04 |       |                                                            |  |
| Natural Killer Cells                      | 2.7  | 4    | 2     | FASLG,IL2RB,KLRD1,PRF1                                     |  |
| Cytotoxic T Lymphocyte-mediated Apoptosis |      | 0.02 |       |                                                            |  |
| of Target Cells                           | 2.71 | 69   | 2     | FASLG,GZMB,PRF1,TRDV3,TRGC2,TRGV9                          |  |
| Neuroprotective Role of THOP1 in          |      | 0.03 |       |                                                            |  |
| Alzheimer's Disease                       | 2.38 | 57   | 2     | GZMA,GZMB,MMP9,PRSS23                                      |  |
|                                           |      | 0.02 |       |                                                            |  |
| Type I Diabetes Mellitus Signaling        | 3.38 | 63   | 2     | FASLG,GZMB,HLA-DQA1,PRF1,SOCS3,TRDV3,TRGC2,TRGV9           |  |
| Systemic Lupus Erythematosus In T Cell    |      | 0.01 |       |                                                            |  |
| Signaling Pathway                         | 2.01 | 72   | 2.236 | FASLG,HLA-DQA1,RHOBTB1,TRDV3,TRGC2,TRGV9,YES1              |  |
|                                           |      | 0.01 |       | ADGRG1,AVPR1A,F2R,IL2RB,MMP9,P2RY12,PTGDR,S1PR5,SOCS3,TGFB |  |
| FAK Signaling                             | 2.97 | 57   | 3.051 | R3,TRDV3,TRGC2,TRGV9                                       |  |

**Table S3:** Correlation analysis of eight biomarkers and 22 immune cell gene sets;

---

| <b>gene</b> | <b>immune_cells</b>          | <b>cor</b>   | <b>p.value</b> |
|-------------|------------------------------|--------------|----------------|
| ADM         | B cells naive                | -0.049321894 | 0.728417923    |
| ADM         | B cells memory               | -0.238126097 | 0.089138592    |
| ADM         | Plasma cells                 | 0.183799497  | 0.192123802    |
| ADM         | T cells CD8                  | 0.066196731  | 0.64102979     |
| ADM         | T cells CD4 naive            | -0.361902404 | 0.008381648    |
| ADM         | T cells CD4 memory resting   | -0.032719156 | 0.817884076    |
| ADM         | T cells CD4 memory activated | -0.117068513 | 0.408509711    |
| ADM         | T cells follicular helper    | -0.154870294 | 0.272961488    |
| ADM         | T cells regulatory (Tregs)   | 0.232753734  | 0.096813305    |
| ADM         | T cells gamma delta          | -0.256121607 | 0.066843523    |
| ADM         | NK cells resting             | -0.043827882 | 0.757692136    |
| ADM         | NK cells activated           | -0.010206885 | 0.942748731    |

---

|      |                           |              |             |
|------|---------------------------|--------------|-------------|
| ADM  | Monocytes                 | 0.21819547   | 0.120191259 |
| ADM  | Macrophages M0            | 0.630869231  | 5.35E-07    |
| ADM  | Macrophages M1            | 0.112641289  | 0.426580046 |
| ADM  | Macrophages M2            | -0.340668509 | 0.01346255  |
| ADM  | Dendritic cells resting   | 0.009284594  | 0.947914453 |
| ADM  | Dendritic cells activated | 0.096814232  | 0.494750373 |
| ADM  | Mast cells resting        | -0.098299468 | 0.488122516 |
| ADM  | Mast cells activated      | 0.222828149  | 0.112328969 |
| ADM  | Eosinophils               | 0.116138035  | 0.412270439 |
| ADM  | Neutrophils               | 0.674166053  | 4.28E-08    |
| CBLB | B cells naive             | 0.130404907  | 0.356817164 |
| CBLB | B cells memory            | 0.173322576  | 0.219150636 |
| CBLB | Plasma cells              | -0.036645149 | 0.796472647 |

|      |                              |              |             |
|------|------------------------------|--------------|-------------|
| CBLB | T cells CD8                  | 0.04440937   | 0.754576934 |
| CBLB | T cells CD4 naive            | 0.184392556  | 0.190668426 |
| CBLB | T cells CD4 memory resting   | 0.101190105  | 0.475357404 |
| CBLB | T cells CD4 memory activated | 0.274234924  | 0.049141624 |
| CBLB | T cells follicular helper    | -0.089839401 | 0.526488449 |
| CBLB | T cells regulatory (Tregs)   | -0.098551787 | 0.487001177 |
| CBLB | T cells gamma delta          | 0.413345735  | 0.002321445 |
| CBLB | NK cells resting             | -0.096113332 | 0.497894258 |
| CBLB | NK cells activated           | 0.193331578  | 0.169677935 |
| CBLB | Monocytes                    | -0.533877705 | 4.58E-05    |
| CBLB | Macrophages M0               | -0.39138224  | 0.004116276 |
| CBLB | Macrophages M1               | 0.070726989  | 0.618310506 |
| CBLB | Macrophages M2               | 0.110985204  | 0.433453935 |

|       |                              |              |             |
|-------|------------------------------|--------------|-------------|
| CBLB  | Dendritic cells resting      | -0.206886635 | 0.141132061 |
| CBLB  | Dendritic cells activated    | 0.089128466  | 0.529779128 |
| CBLB  | Mast cells resting           | 0.19050012   | 0.176136289 |
| CBLB  | Mast cells activated         | -0.199901968 | 0.155357825 |
| CBLB  | Eosinophils                  | -0.061050669 | 0.667237677 |
| CBLB  | Neutrophils                  | -0.388746583 | 0.004398015 |
| FASLG | B cells naive                | -0.128429056 | 0.364212458 |
| FASLG | B cells memory               | 0.010722255  | 0.939863163 |
| FASLG | Plasma cells                 | 0.184765975  | 0.189756097 |
| FASLG | T cells CD8                  | 0.313820733  | 0.023478973 |
| FASLG | T cells CD4 naive            | -0.207649654 | 0.139638887 |
| FASLG | T cells CD4 memory resting   | 0.028530749  | 0.840872424 |
| FASLG | T cells CD4 memory activated | 0.293758762  | 0.034539915 |

|       |                            |              |             |
|-------|----------------------------|--------------|-------------|
| FASLG | T cells follicular helper  | -0.034023103 | 0.810757213 |
| FASLG | T cells regulatory (Tregs) | -0.268895134 | 0.053909817 |
| FASLG | T cells gamma delta        | -0.090858881 | 0.521787345 |
| FASLG | NK cells resting           | 0.463444867  | 0.000540121 |
| FASLG | NK cells activated         | 0.228048735  | 0.103946962 |
| FASLG | Monocytes                  | -0.38951463  | 0.004314216 |
| FASLG | Macrophages M0             | -0.332139041 | 0.01614617  |
| FASLG | Macrophages M1             | 0.149980208  | 0.288576808 |
| FASLG | Macrophages M2             | 0.292840525  | 0.035135081 |
| FASLG | Dendritic cells resting    | -0.083246634 | 0.557386936 |
| FASLG | Dendritic cells activated  | -0.039118208 | 0.783059982 |
| FASLG | Mast cells resting         | -0.099043484 | 0.484819893 |
| FASLG | Mast cells activated       | 0.017575875  | 0.901576596 |



|       |                              |              |             |
|-------|------------------------------|--------------|-------------|
| FASLG | Eosinophils                  | -0.115531549 | 0.414732363 |
| FASLG | Neutrophils                  | -0.058329495 | 0.681259418 |
| MMP9  | B cells naive                | 0.115479858  | 0.414942582 |
| MMP9  | B cells memory               | -0.428667103 | 0.001521187 |
| MMP9  | Plasma cells                 | 0.016812285  | 0.905832889 |
| MMP9  | T cells CD8                  | -0.105001161 | 0.458802908 |
| MMP9  | T cells CD4 naive            | -0.201755282 | 0.151484283 |
| MMP9  | T cells CD4 memory resting   | -0.212904143 | 0.129674682 |
| MMP9  | T cells CD4 memory activated | -0.159847682 | 0.257653599 |
| MMP9  | T cells follicular helper    | -0.065563857 | 0.644230409 |
| MMP9  | T cells regulatory (Tregs)   | 0.166252606  | 0.238820308 |
| MMP9  | T cells gamma delta          | -0.230352007 | 0.100405793 |
| MMP9  | NK cells resting             | -0.0113876   | 0.936139024 |

|      |                           |              |             |
|------|---------------------------|--------------|-------------|
| MMP9 | NK cells activated        | -0.013802374 | 0.922634735 |
| MMP9 | Monocytes                 | 0.216653763  | 0.122898311 |
| MMP9 | Macrophages M0            | 0.781479023  | 8.11E-12    |
| MMP9 | Macrophages M1            | 0.004245696  | 0.976169125 |
| MMP9 | Macrophages M2            | -0.105888733 | 0.454992975 |
| MMP9 | Dendritic cells resting   | -0.03796098  | 0.789328698 |
| MMP9 | Dendritic cells activated | 0.062847803  | 0.658038389 |
| MMP9 | Mast cells resting        | 0.013975618  | 0.921666681 |
| MMP9 | Mast cells activated      | 0.172590554  | 0.221133185 |
| MMP9 | Eosinophils               | 0.237930218  | 0.089409803 |
| MMP9 | Neutrophils               | 0.658416375  | 1.13E-07    |
| NRG1 | B cells naive             | 0.020170131  | 0.887137248 |
| NRG1 | B cells memory            | -0.107858178 | 0.446601095 |

|      |                              |              |             |
|------|------------------------------|--------------|-------------|
| NRG1 | Plasma cells                 | -0.05041124  | 0.722657325 |
| NRG1 | T cells CD8                  | -0.152182092 | 0.281474827 |
| NRG1 | T cells CD4 naive            | -0.028602113 | 0.84047958  |
| NRG1 | T cells CD4 memory resting   | 0.148896026  | 0.292116391 |
| NRG1 | T cells CD4 memory activated | 0.162453698  | 0.249873716 |
| NRG1 | T cells follicular helper    | -0.088619899 | 0.532139319 |
| NRG1 | T cells regulatory (Tregs)   | 0.021769395  | 0.878253684 |
| NRG1 | T cells gamma delta          | -0.061064348 | 0.667167471 |
| NRG1 | NK cells resting             | -0.32882434  | 0.017305642 |
| NRG1 | NK cells activated           | -0.277174977 | 0.046666427 |
| NRG1 | Monocytes                    | 0.408494462  | 0.002643221 |
| NRG1 | Macrophages M0               | 0.172689189  | 0.220865324 |
| NRG1 | Macrophages M1               | 0.085093337  | 0.548646304 |

|      |                            |              |             |
|------|----------------------------|--------------|-------------|
| NRG1 | Macrophages M2             | -0.238370282 | 0.088801396 |
| NRG1 | Dendritic cells resting    | 0.226788183  | 0.105925317 |
| NRG1 | Dendritic cells activated  | -0.078398771 | 0.580639972 |
| NRG1 | Mast cells resting         | 0.184499632  | 0.190406501 |
| NRG1 | Mast cells activated       | 0.16783478   | 0.234316989 |
| NRG1 | Eosinophils                | 0.034432202  | 0.808524344 |
| NRG1 | Neutrophils                | -0.066192932 | 0.64104898  |
| PI3  | B cells naive              | 0.065234982  | 0.645896154 |
| PI3  | B cells memory             | -0.222587952 | 0.112726698 |
| PI3  | Plasma cells               | 0.088862253  | 0.531013943 |
| PI3  | T cells CD8                | -0.063742048 | 0.653479402 |
| PI3  | T cells CD4 naive          | -0.121006705 | 0.392813489 |
| PI3  | T cells CD4 memory resting | 0.093498634  | 0.509712798 |

|     |                              |              |             |
|-----|------------------------------|--------------|-------------|
| PI3 | T cells CD4 memory activated | 0.127515063  | 0.367664577 |
| PI3 | T cells follicular helper    | -0.010548428 | 0.94083634  |
| PI3 | T cells regulatory (Tregs)   | 0.180680501  | 0.199908288 |
| PI3 | T cells gamma delta          | -0.122900006 | 0.385395437 |
| PI3 | NK cells resting             | -0.279774635 | 0.044563441 |
| PI3 | NK cells activated           | 0.019641073  | 0.890079137 |
| PI3 | Monocytes                    | 0.211255769  | 0.132741123 |
| PI3 | Macrophages M0               | 0.405686189  | 0.002847024 |
| PI3 | Macrophages M1               | 0.0234207    | 0.869096623 |
| PI3 | Macrophages M2               | -0.438520708 | 0.001146949 |
| PI3 | Dendritic cells resting      | 0.02908414   | 0.83782711  |
| PI3 | Dendritic cells activated    | 0.106965117  | 0.450395831 |
| PI3 | Mast cells resting           | 0.143501794  | 0.310145912 |

|      |                              |              |             |
|------|------------------------------|--------------|-------------|
| PI3  | Mast cells activated         | -0.01678489  | 0.905985638 |
| PI3  | Eosinophils                  | 0.153154967  | 0.27837386  |
| PI3  | Neutrophils                  | 0.284638912  | 0.040836807 |
| RORA | B cells naive                | 0.069896071  | 0.622451984 |
| RORA | B cells memory               | 0.202770131  | 0.149393646 |
| RORA | Plasma cells                 | -0.011558468 | 0.935182836 |
| RORA | T cells CD8                  | 0.18820816   | 0.181492785 |
| RORA | T cells CD4 naive            | 0.094201301  | 0.506522787 |
| RORA | T cells CD4 memory resting   | 0.080217444  | 0.571865104 |
| RORA | T cells CD4 memory activated | 0.331636721  | 0.016317504 |
| RORA | T cells follicular helper    | -0.062876567 | 0.657891555 |
| RORA | T cells regulatory (Tregs)   | -0.055731986 | 0.694744371 |
| RORA | T cells gamma delta          | 0.278104031  | 0.045905764 |

|        |                           |              |             |
|--------|---------------------------|--------------|-------------|
| RORA   | NK cells resting          | -0.025506414 | 0.857555047 |
| RORA   | NK cells activated        | 0.259842439  | 0.062843561 |
| RORA   | Monocytes                 | -0.544039134 | 3.06E-05    |
| RORA   | Macrophages M0            | -0.447915766 | 0.000869273 |
| RORA   | Macrophages M1            | -0.039516048 | 0.780908004 |
| RORA   | Macrophages M2            | 0.0697815    | 0.62302394  |
| RORA   | Dendritic cells resting   | -0.137463096 | 0.331156355 |
| RORA   | Dendritic cells activated | 0.081424038  | 0.56607739  |
| RORA   | Mast cells resting        | 0.160487834  | 0.255727596 |
| RORA   | Mast cells activated      | -0.144226994 | 0.30768145  |
| RORA   | Eosinophils               | -0.008557745 | 0.951987019 |
| RORA   | Neutrophils               | -0.329182656 | 0.017176985 |
| SH2D1B | B cells naive             | -0.150810925 | 0.285883771 |

|        |                              |              |             |
|--------|------------------------------|--------------|-------------|
| SH2D1B | B cells memory               | 0.14864115   | 0.292952584 |
| SH2D1B | Plasma cells                 | 0.086736676  | 0.540923815 |
| SH2D1B | T cells CD8                  | 0.071978079  | 0.612096956 |
| SH2D1B | T cells CD4 naive            | -0.197887495 | 0.159650362 |
| SH2D1B | T cells CD4 memory resting   | 0.071126037  | 0.616325729 |
| SH2D1B | T cells CD4 memory activated | 0.046620515  | 0.74276687  |
| SH2D1B | T cells follicular helper    | 0.004730784  | 0.973447277 |
| SH2D1B | T cells regulatory (Tregs)   | -0.178826235 | 0.204640713 |
| SH2D1B | T cells gamma delta          | -0.187447603 | 0.183295902 |
| SH2D1B | NK cells resting             | 0.496166049  | 0.000183505 |
| SH2D1B | NK cells activated           | -0.027425525 | 0.846961356 |
| SH2D1B | Monocytes                    | -0.228658928 | 0.102999587 |
| SH2D1B | Macrophages M0               | -0.205746461 | 0.143385433 |



|        |                           |              |             |
|--------|---------------------------|--------------|-------------|
| SH2D1B | Macrophages M1            | 0.074103526  | 0.601602849 |
| SH2D1B | Macrophages M2            | 0.172231973  | 0.222108872 |
| SH2D1B | Dendritic cells resting   | 0.060879176  | 0.668118095 |
| SH2D1B | Dendritic cells activated | -0.137677191 | 0.33039654  |
| SH2D1B | Mast cells resting        | -0.203830299 | 0.14723253  |
| SH2D1B | Mast cells activated      | 0.10936135   | 0.440253937 |
| SH2D1B | Eosinophils               | -0.080161688 | 0.572133212 |
| SH2D1B | Neutrophils               | 0.0112402    | 0.936963954 |

**Table S4:** List of 590 miRNA targets of the biomarkers obtained from miRDB database;

| miRNA          | Symbol |
|----------------|--------|
| hsa-mir-379-3p | ADM    |
| hsa-mir-380-3p | ADM    |

|                  |     |
|------------------|-----|
| hsa-mir-411-3p   | ADM |
| hsa-mir-1238-3p  | ADM |
| hsa-mir-670-3p   | ADM |
| hsa-mir-5697     | ADM |
| hsa-mir-6780a-3p | ADM |
| hsa-mir-3924     | ADM |
| hsa-mir-11401    | ADM |
| hsa-mir-410-3p   | ADM |
| hsa-mir-7111-3p  | ADM |
| hsa-mir-302f     | ADM |
| hsa-mir-4670-3p  | ADM |
| hsa-mir-3121-3p  | ADM |
| hsa-mir-4666a-3p | ADM |

|                  |     |
|------------------|-----|
| hsa-mir-4325     | ADM |
| hsa-mir-6881-3p  | ADM |
| hsa-mir-3978     | ADM |
| hsa-mir-3675-3p  | ADM |
| hsa-mir-6886-3p  | ADM |
| hsa-mir-374c-5p  | ADM |
| hsa-mir-655-3p   | ADM |
| hsa-mir-4524a-3p | ADM |
| hsa-mir-4495     | ADM |
| hsa-mir-3059-5p  | ADM |
| hsa-mir-938      | ADM |
| hsa-mir-365a-3p  | ADM |
| hsa-mir-26b-5p   | ADM |

|                 |      |
|-----------------|------|
| hsa-mir-26a-5p  | ADM  |
| hsa-mir-338-5p  | ADM  |
| hsa-mir-365b-3p | ADM  |
| hsa-mir-1297    | ADM  |
| hsa-mir-4465    | ADM  |
| hsa-mir-4282    | CBLB |
| hsa-mir-4701-5p | CBLB |
| hsa-mir-548f-5p | CBLB |
| hsa-mir-6894-5p | CBLB |
| hsa-mir-588     | CBLB |
| hsa-mir-3678-3p | CBLB |
| hsa-mir-3646    | CBLB |
| hsa-mir-6824-5p | CBLB |

|                  |      |
|------------------|------|
| hsa-mir-557      | CBLB |
| hsa-mir-3120-3p  | CBLB |
| hsa-mir-302a-5p  | CBLB |
| hsa-mir-548o-3p  | CBLB |
| hsa-mir-1323     | CBLB |
| hsa-mir-548aw    | CBLB |
| hsa-mir-576-5p   | CBLB |
| hsa-mir-548x-5p  | CBLB |
| hsa-mir-3200-5p  | CBLB |
| hsa-mir-548g-5p  | CBLB |
| hsa-mir-548as-3p | CBLB |
| hsa-mir-3681-3p  | CBLB |
| hsa-mir-9985     | CBLB |

|                  |      |
|------------------|------|
| hsa-mir-548aj-5p | CBLB |
| hsa-mir-3129-5p  | CBLB |
| hsa-mir-181c-5p  | CBLB |
| hsa-mir-181d-5p  | CBLB |
| hsa-mir-4262     | CBLB |
| hsa-mir-5093     | CBLB |
| hsa-mir-181a-5p  | CBLB |
| hsa-mir-181b-5p  | CBLB |
| hsa-mir-4776-3p  | CBLB |
| hsa-mir-199a-3p  | CBLB |
| hsa-mir-507      | CBLB |
| hsa-mir-199b-3p  | CBLB |
| hsa-mir-621      | CBLB |

|                 |      |
|-----------------|------|
| hsa-mir-4709-5p | CBLB |
| hsa-mir-875-3p  | CBLB |
| hsa-mir-324-3p  | CBLB |
| hsa-mir-590-3p  | CBLB |
| hsa-mir-3910    | CBLB |
| hsa-mir-8067    | CBLB |
| hsa-mir-29a-5p  | CBLB |
| hsa-mir-301a-3p | CBLB |
| hsa-mir-12124   | CBLB |
| hsa-mir-301b-3p | CBLB |
| hsa-mir-3666    | CBLB |
| hsa-mir-128-3p  | CBLB |
| hsa-mir-4295    | CBLB |

|                 |      |
|-----------------|------|
| hsa-mir-130a-3p | CBLB |
| hsa-mir-216a-3p | CBLB |
| hsa-mir-130b-3p | CBLB |
| hsa-mir-5680    | CBLB |
| hsa-mir-589-3p  | CBLB |
| hsa-mir-27a-3p  | CBLB |
| hsa-mir-513a-5p | CBLB |
| hsa-mir-27b-3p  | CBLB |
| hsa-mir-19a-3p  | CBLB |
| hsa-mir-944     | CBLB |
| hsa-mir-19b-3p  | CBLB |
| hsa-mir-6761-5p | CBLB |
| hsa-mir-4680-5p | CBLB |



|                  |      |
|------------------|------|
| hsa-mir-4533     | CBLB |
| hsa-mir-6508-5p  | CBLB |
| hsa-mir-607      | CBLB |
| hsa-mir-340-5p   | CBLB |
| hsa-mir-1299     | CBLB |
| hsa-mir-454-3p   | CBLB |
| hsa-mir-154-3p   | CBLB |
| hsa-mir-10522-5p | CBLB |
| hsa-mir-487a-3p  | CBLB |
| hsa-mir-4797-3p  | CBLB |
| hsa-mir-1843     | CBLB |
| hsa-mir-4322     | CBLB |
| hsa-mir-4802-5p  | CBLB |

|                  |      |
|------------------|------|
| hsa-mir-4276     | CBLB |
| hsa-mir-4265     | CBLB |
| hsa-mir-6794-3p  | CBLB |
| hsa-mir-7855-5p  | CBLB |
| hsa-mir-6069     | CBLB |
| hsa-mir-4296     | CBLB |
| hsa-mir-8054     | CBLB |
| hsa-mir-4422     | CBLB |
| hsa-mir-1257     | CBLB |
| hsa-mir-548k     | CBLB |
| hsa-mir-548av-5p | CBLB |
| hsa-mir-450b-5p  | CBLB |
| hsa-mir-30a-5p   | CBLB |

|                 |      |
|-----------------|------|
| hsa-mir-30c-5p  | CBLB |
| hsa-mir-30b-5p  | CBLB |
| hsa-mir-30d-5p  | CBLB |
| hsa-mir-30e-5p  | CBLB |
| hsa-mir-449c-5p | CBLB |
| hsa-mir-34b-5p  | CBLB |
| hsa-mir-3064-3p | CBLB |
| hsa-mir-3680-3p | CBLB |
| hsa-mir-2682-5p | CBLB |
| hsa-mir-6073    | CBLB |
| hsa-mir-129-5p  | CBLB |
| hsa-mir-6732-3p | CBLB |
| hsa-mir-3714    | CBLB |

|                 |      |
|-----------------|------|
| hsa-mir-23a-3p  | CBLB |
| hsa-mir-9983-3p | CBLB |
| hsa-mir-6128    | CBLB |
| hsa-mir-23c     | CBLB |
| hsa-mir-548p    | CBLB |
| hsa-mir-23b-3p  | CBLB |
| hsa-mir-548an   | CBLB |
| hsa-mir-4775    | CBLB |
| hsa-mir-3133    | CBLB |
| hsa-mir-4773    | CBLB |
| hsa-mir-148a-3p | CBLB |
| hsa-mir-152-3p  | CBLB |
| hsa-mir-95-5p   | CBLB |

|                 |       |
|-----------------|-------|
| hsa-mir-148b-3p | CBLB  |
| hsa-mir-3163    | CBLB  |
| hsa-mir-6887-3p | FASLG |
| hsa-mir-15b-3p  | FASLG |
| hsa-mir-4691-5p | FASLG |
| hsa-mir-6792-3p | FASLG |
| hsa-mir-92a-3p  | FASLG |
| hsa-mir-363-3p  | FASLG |
| hsa-mir-6811-3p | FASLG |
| hsa-mir-25-3p   | FASLG |
| hsa-mir-32-5p   | FASLG |
| hsa-mir-92b-3p  | FASLG |
| hsa-mir-367-3p  | FASLG |

|                   |       |
|-------------------|-------|
| hsa-mir-659-5p    | FASLG |
| hsa-mir-4458      | FASLG |
| hsa-let-7d-5p     | FASLG |
| hsa-mir-4474-3p   | FASLG |
| hsa-mir-4503      | FASLG |
| hsa-mir-24-3p     | FASLG |
| hsa-mir-586       | FASLG |
| hsa-mir-4269      | FASLG |
| hsa-mir-219a-1-3p | FASLG |
| hsa-mir-6715b-5p  | FASLG |
| hsa-let-7f-5p     | FASLG |
| hsa-mir-4500      | FASLG |
| hsa-let-7b-5p     | FASLG |

|                 |       |
|-----------------|-------|
| hsa-let-7g-5p   | FASLG |
| hsa-mir-98-5p   | FASLG |
| hsa-let-7a-5p   | FASLG |
| hsa-let-7i-5p   | FASLG |
| hsa-mir-214-5p  | FASLG |
| hsa-let-7e-5p   | FASLG |
| hsa-let-7c-5p   | FASLG |
| hsa-mir-12129   | FASLG |
| hsa-mir-6740-3p | FASLG |
| hsa-mir-6514-3p | FASLG |
| hsa-mir-1258    | FASLG |
| hsa-mir-4424    | FASLG |
| hsa-mir-5579-3p | FASLG |

|                 |       |
|-----------------|-------|
| hsa-mir-149-5p  | FASLG |
| hsa-mir-6873-3p | FASLG |
| hsa-mir-7853-5p | FASLG |
| hsa-mir-105-5p  | FASLG |
| hsa-mir-590-5p  | FASLG |
| hsa-mir-21-5p   | FASLG |
| hsa-mir-8485    | FASLG |
| hsa-mir-6734-3p | MMP9  |
| hsa-mir-548j-5p | NRG1  |
| hsa-mir-548c-5p | NRG1  |
| hsa-mir-361-3p  | NRG1  |
| hsa-mir-548b-5p | NRG1  |
| hsa-mir-3202    | NRG1  |



|                  |      |
|------------------|------|
| hsa-mir-548ad-5p | NRG1 |
| hsa-mir-548d-5p  | NRG1 |
| hsa-mir-548h-5p  | NRG1 |
| hsa-mir-548a-5p  | NRG1 |
| hsa-mir-548i     | NRG1 |
| hsa-mir-548as-5p | NRG1 |
| hsa-mir-548w     | NRG1 |
| hsa-mir-548ab    | NRG1 |
| hsa-mir-548ay-5p | NRG1 |
| hsa-mir-548o-5p  | NRG1 |
| hsa-mir-3942-5p  | NRG1 |
| hsa-mir-548ap-5p | NRG1 |
| hsa-mir-548ar-5p | NRG1 |

|                  |      |
|------------------|------|
| hsa-mir-548au-5p | NRG1 |
| hsa-mir-548y     | NRG1 |
| hsa-mir-548ar-3p | NRG1 |
| hsa-mir-548ae-5p | NRG1 |
| hsa-mir-548am-5p | NRG1 |
| hsa-mir-548aq-5p | NRG1 |
| hsa-mir-548ak    | NRG1 |
| hsa-mir-548bb-5p | NRG1 |
| hsa-mir-4427     | NRG1 |
| hsa-mir-4665-5p  | NRG1 |
| hsa-mir-4760-3p  | NRG1 |
| hsa-mir-186-5p   | NRG1 |
| hsa-mir-1275     | NRG1 |

|                 |      |
|-----------------|------|
| hsa-mir-5698    | NRG1 |
| hsa-mir-3671    | NRG1 |
| hsa-mir-7111-5p | NRG1 |
| hsa-mir-569     | NRG1 |
| hsa-mir-3182    | NRG1 |
| hsa-mir-552-3p  | NRG1 |
| hsa-mir-323a-5p | NRG1 |
| hsa-mir-329-5p  | NRG1 |
| hsa-mir-559     | NRG1 |
| hsa-mir-200c-3p | NRG1 |
| hsa-mir-4310    | NRG1 |
| hsa-mir-429     | NRG1 |
| hsa-mir-3143    | NRG1 |

|                 |      |
|-----------------|------|
| hsa-mir-4697-5p | NRG1 |
| hsa-mir-200b-3p | NRG1 |
| hsa-mir-152-5p  | NRG1 |
| hsa-mir-6124    | NRG1 |
| hsa-mir-625-5p  | NRG1 |
| hsa-mir-942-3p  | NRG1 |
| hsa-mir-4448    | NRG1 |
| hsa-mir-7152-5p | NRG1 |
| hsa-mir-4999-5p | NRG1 |
| hsa-mir-935     | NRG1 |
| hsa-mir-4723-5p | NRG1 |
| hsa-mir-500a-3p | NRG1 |
| hsa-mir-12123   | NRG1 |

|                  |      |
|------------------|------|
| hsa-mir-1228-3p  | NRG1 |
| hsa-mir-7108-5p  | NRG1 |
| hsa-mir-6870-5p  | NRG1 |
| hsa-mir-3192-5p  | NRG1 |
| hsa-mir-3140-3p  | NRG1 |
| hsa-mir-4659b-3p | NRG1 |
| hsa-mir-4659a-3p | NRG1 |
| hsa-mir-452-3p   | NRG1 |
| hsa-mir-4272     | NRG1 |
| hsa-mir-183-5p   | NRG1 |
| hsa-mir-4540     | NRG1 |
| hsa-mir-126-5p   | NRG1 |
| hsa-mir-936      | NRG1 |

|                   |      |
|-------------------|------|
| hsa-mir-568       | NRG1 |
| hsa-mir-4662a-3p  | NRG1 |
| hsa-mir-539-3p    | NRG1 |
| hsa-mir-4639-3p   | NRG1 |
| hsa-mir-485-3p    | NRG1 |
| hsa-mir-222-5p    | NRG1 |
| hsa-mir-6516-5p   | NRG1 |
| hsa-mir-196a-1-3p | NRG1 |
| hsa-mir-4778-3p   | NRG1 |
| hsa-mir-4504      | NRG1 |
| hsa-mir-5692a     | NRG1 |
| hsa-mir-4318      | NRG1 |
| hsa-mir-10527-5p  | NRG1 |

|                  |      |
|------------------|------|
| hsa-mir-758-3p   | NRG1 |
| hsa-mir-4666b    | NRG1 |
| hsa-mir-6830-3p  | NRG1 |
| hsa-mir-4699-3p  | NRG1 |
| hsa-mir-5187-3p  | NRG1 |
| hsa-mir-4645-3p  | NRG1 |
| hsa-mir-3920     | NRG1 |
| hsa-mir-137-3p   | NRG1 |
| hsa-mir-6875-3p  | NRG1 |
| hsa-mir-3689b-3p | PI3  |
| hsa-mir-3689c    | PI3  |
| hsa-mir-3689a-3p | PI3  |
| hsa-mir-6780a-5p | PI3  |

|                  |      |
|------------------|------|
| hsa-mir-6779-5p  | PI3  |
| hsa-mir-1273h-5p | PI3  |
| hsa-mir-30b-3p   | PI3  |
| hsa-mir-7106-5p  | PI3  |
| hsa-mir-1301-5p  | RORA |
| hsa-mir-517-5p   | RORA |
| hsa-mir-3611     | RORA |
| hsa-mir-6502-5p  | RORA |
| hsa-mir-1236-3p  | RORA |
| hsa-mir-497-5p   | RORA |
| hsa-mir-4796-3p  | RORA |
| hsa-mir-135a-5p  | RORA |
| hsa-mir-4433b-5p | RORA |



|                  |      |
|------------------|------|
| hsa-mir-424-5p   | RORA |
| hsa-mir-200a-5p  | RORA |
| hsa-mir-4263     | RORA |
| hsa-mir-520f-3p  | RORA |
| hsa-mir-200b-5p  | RORA |
| hsa-mir-3934-3p  | RORA |
| hsa-mir-6510-5p  | RORA |
| hsa-mir-1324     | RORA |
| hsa-mir-3622b-3p | RORA |
| hsa-mir-3622a-3p | RORA |
| hsa-mir-6504-3p  | RORA |
| hsa-mir-10399-5p | RORA |
| hsa-mir-6739-3p  | RORA |

|                  |      |
|------------------|------|
| hsa-mir-10524-5p | RORA |
| hsa-mir-4731-3p  | RORA |
| hsa-mir-6508-3p  | RORA |
| hsa-mir-29c-3p   | RORA |
| hsa-mir-29a-3p   | RORA |
| hsa-mir-3153     | RORA |
| hsa-mir-6797-3p  | RORA |
| hsa-mir-29b-3p   | RORA |
| hsa-mir-323b-3p  | RORA |
| hsa-mir-8063     | RORA |
| hsa-mir-372-3p   | RORA |
| hsa-mir-9718     | RORA |
| hsa-mir-5011-3p  | RORA |

|                 |      |
|-----------------|------|
| hsa-mir-520e-3p | RORA |
| hsa-mir-1250-3p | RORA |
| hsa-mir-8087    | RORA |
| hsa-mir-6083    | RORA |
| hsa-mir-628-5p  | RORA |
| hsa-mir-4641    | RORA |
| hsa-mir-520b-3p | RORA |
| hsa-mir-520c-3p | RORA |
| hsa-mir-302c-3p | RORA |
| hsa-mir-520d-3p | RORA |
| hsa-mir-6832-3p | RORA |
| hsa-mir-12132   | RORA |
| hsa-mir-3688-5p | RORA |

|                 |      |
|-----------------|------|
| hsa-mir-6797-5p | RORA |
| hsa-mir-302a-3p | RORA |
| hsa-mir-520a-3p | RORA |
| hsa-mir-1249-5p | RORA |
| hsa-mir-302d-3p | RORA |
| hsa-mir-302b-3p | RORA |
| hsa-mir-6838-5p | RORA |
| hsa-mir-5007-3p | RORA |
| hsa-mir-329-3p  | RORA |
| hsa-mir-502-3p  | RORA |
| hsa-mir-6733-5p | RORA |
| hsa-mir-421     | RORA |
| hsa-mir-501-3p  | RORA |

|                 |      |
|-----------------|------|
| hsa-mir-362-3p  | RORA |
| hsa-mir-15b-5p  | RORA |
| hsa-mir-539-5p  | RORA |
| hsa-mir-4786-3p | RORA |
| hsa-mir-16-5p   | RORA |
| hsa-mir-4801    | RORA |
| hsa-mir-8074    | RORA |
| hsa-mir-4717-3p | RORA |
| hsa-mir-4677-5p | RORA |
| hsa-mir-15a-5p  | RORA |
| hsa-mir-195-5p  | RORA |
| hsa-mir-6739-5p | RORA |
| hsa-mir-7159-5p | RORA |

|                   |      |
|-------------------|------|
| hsa-mir-219a-2-3p | RORA |
| hsa-mir-1229-3p   | RORA |
| hsa-let-7a-2-3p   | RORA |
| hsa-mir-381-3p    | RORA |
| hsa-mir-3150b-3p  | RORA |
| hsa-mir-4784      | RORA |
| hsa-mir-581       | RORA |
| hsa-mir-4646-5p   | RORA |
| hsa-let-7g-3p     | RORA |
| hsa-mir-671-5p    | RORA |
| hsa-mir-204-3p    | RORA |
| hsa-mir-133a-5p   | RORA |
| hsa-mir-300       | RORA |

|                  |      |
|------------------|------|
| hsa-mir-889-3p   | RORA |
| hsa-mir-6806-5p  | RORA |
| hsa-mir-130b-5p  | RORA |
| hsa-mir-548at-5p | RORA |
| hsa-mir-4778-5p  | RORA |
| hsa-mir-1281     | RORA |
| hsa-mir-570-3p   | RORA |
| hsa-mir-1178-3p  | RORA |
| hsa-mir-3620-3p  | RORA |
| hsa-mir-4753-3p  | RORA |
| hsa-mir-208b-5p  | RORA |
| hsa-mir-548ao-5p | RORA |
| hsa-mir-4491     | RORA |

|                 |      |
|-----------------|------|
| hsa-mir-3185    | RORA |
| hsa-mir-195-3p  | RORA |
| hsa-mir-548g-3p | RORA |
| hsa-mir-4657    | RORA |
| hsa-mir-3162-5p | RORA |
| hsa-mir-208a-5p | RORA |
| hsa-mir-548ax   | RORA |
| hsa-mir-3147    | RORA |
| hsa-mir-12116   | RORA |
| hsa-mir-12125   | RORA |
| hsa-mir-3149    | RORA |
| hsa-mir-1284    | RORA |
| hsa-mir-2116-5p | RORA |



|                 |      |
|-----------------|------|
| hsa-mir-3668    | RORA |
| hsa-mir-3148    | RORA |
| hsa-mir-16-2-3p | RORA |
| hsa-mir-33a-3p  | RORA |
| hsa-let-7a-3p   | RORA |
| hsa-mir-98-3p   | RORA |
| hsa-mir-6079    | RORA |
| hsa-mir-3158-3p | RORA |
| hsa-mir-708-5p  | RORA |
| hsa-mir-4273    | RORA |
| hsa-mir-6836-5p | RORA |
| hsa-mir-4277    | RORA |
| hsa-mir-4789-3p | RORA |

|                 |      |
|-----------------|------|
| hsa-mir-28-5p   | RORA |
| hsa-mir-107     | RORA |
| hsa-mir-6132    | RORA |
| hsa-mir-20a-3p  | RORA |
| hsa-mir-103a-3p | RORA |
| hsa-mir-148a-5p | RORA |
| hsa-mir-494-3p  | RORA |
| hsa-mir-6515-5p | RORA |
| hsa-let-7b-3p   | RORA |
| hsa-mir-5694    | RORA |
| hsa-mir-633     | RORA |
| hsa-mir-12120   | RORA |
| hsa-mir-513b-3p | RORA |

|                  |      |
|------------------|------|
| hsa-mir-3973     | RORA |
| hsa-mir-610      | RORA |
| hsa-mir-7151-3p  | RORA |
| hsa-mir-3085-5p  | RORA |
| hsa-mir-302e     | RORA |
| hsa-mir-603      | RORA |
| hsa-mir-19b-2-5p | RORA |
| hsa-mir-7850-5p  | RORA |
| hsa-mir-1290     | RORA |
| hsa-mir-1276     | RORA |
| hsa-mir-4777-5p  | RORA |
| hsa-mir-2052     | RORA |
| hsa-mir-6867-5p  | RORA |

|                  |      |
|------------------|------|
| hsa-mir-7156-5p  | RORA |
| hsa-mir-19b-1-5p | RORA |
| hsa-mir-4711-5p  | RORA |
| hsa-mir-19a-5p   | RORA |
| hsa-let-7f-1-3p  | RORA |
| hsa-mir-1207-3p  | RORA |
| hsa-mir-3065-5p  | RORA |
| hsa-mir-6499-3p  | RORA |
| hsa-mir-302c-5p  | RORA |
| hsa-mir-4676-3p  | RORA |
| hsa-mir-6835-3p  | RORA |
| hsa-mir-892c-3p  | RORA |
| hsa-mir-3154     | RORA |

|                 |      |
|-----------------|------|
| hsa-mir-1248    | RORA |
| hsa-mir-320a-5p | RORA |
| hsa-mir-3139    | RORA |
| hsa-mir-4311    | RORA |
| hsa-mir-452-5p  | RORA |
| hsa-mir-3128    | RORA |
| hsa-mir-5693    | RORA |
| hsa-mir-6833-5p | RORA |
| hsa-mir-4729    | RORA |
| hsa-mir-548l    | RORA |
| hsa-mir-1279    | RORA |
| hsa-mir-5590-3p | RORA |
| hsa-mir-510-3p  | RORA |

|                 |      |
|-----------------|------|
| hsa-mir-142-5p  | RORA |
| hsa-mir-651-5p  | RORA |
| hsa-mir-3662    | RORA |
| hsa-mir-3944-5p | RORA |
| hsa-mir-3691-5p | RORA |
| hsa-mir-7157-5p | RORA |
| hsa-mir-6500-3p | RORA |
| hsa-mir-6784-3p | RORA |
| hsa-mir-6862-3p | RORA |
| hsa-mir-3168    | RORA |
| hsa-mir-518a-5p | RORA |
| hsa-mir-527     | RORA |
| hsa-mir-8084    | RORA |

|                 |      |
|-----------------|------|
| hsa-mir-4644    | RORA |
| hsa-mir-205-5p  | RORA |
| hsa-mir-543     | RORA |
| hsa-mir-561-3p  | RORA |
| hsa-mir-4728-3p | RORA |
| hsa-mir-185-5p  | RORA |
| hsa-mir-8078    | RORA |
| hsa-mir-4668-5p | RORA |
| hsa-mir-147b-5p | RORA |
| hsa-mir-323a-3p | RORA |
| hsa-mir-6817-3p | RORA |
| hsa-mir-577     | RORA |
| hsa-mir-506-5p  | RORA |

|                 |      |
|-----------------|------|
| hsa-mir-4799-5p | RORA |
| hsa-mir-526b-3p | RORA |
| hsa-mir-576-3p  | RORA |
| hsa-mir-4261    | RORA |
| hsa-mir-548t-3p | RORA |
| hsa-mir-106b-5p | RORA |
| hsa-mir-144-3p  | RORA |
| hsa-mir-548c-3p | RORA |
| hsa-mir-548aa   | RORA |
| hsa-mir-520d-5p | RORA |
| hsa-mir-524-5p  | RORA |
| hsa-let-7c-3p   | RORA |
| hsa-mir-20b-5p  | RORA |



|                  |      |
|------------------|------|
| hsa-mir-106a-5p  | RORA |
| hsa-mir-548ap-3p | RORA |
| hsa-mir-93-5p    | RORA |
| hsa-mir-17-5p    | RORA |
| hsa-mir-20a-5p   | RORA |
| hsa-mir-7154-5p  | RORA |
| hsa-mir-519d-3p  | RORA |
| hsa-mir-651-3p   | RORA |
| hsa-mir-5580-3p  | RORA |
| hsa-mir-5584-3p  | RORA |
| hsa-mir-3918     | RORA |
| hsa-mir-6757-3p  | RORA |
| hsa-mir-6856-5p  | RORA |

|                 |      |
|-----------------|------|
| hsa-mir-32-3p   | RORA |
| hsa-mir-7848-3p | RORA |
| hsa-mir-8056    | RORA |
| hsa-mir-5586-3p | RORA |
| hsa-mir-4306    | RORA |
| hsa-mir-5692c   | RORA |
| hsa-mir-376c-5p | RORA |
| hsa-mir-10a-5p  | RORA |
| hsa-mir-548d-3p | RORA |
| hsa-mir-7110-3p | RORA |
| hsa-mir-33b-5p  | RORA |
| hsa-mir-33a-5p  | RORA |
| hsa-mir-130a-5p | RORA |

|                  |      |
|------------------|------|
| hsa-mir-656-3p   | RORA |
| hsa-mir-10b-5p   | RORA |
| hsa-mir-5692b    | RORA |
| hsa-mir-548bb-3p | RORA |
| hsa-mir-3688-3p  | RORA |
| hsa-mir-369-3p   | RORA |
| hsa-mir-125a-5p  | RORA |
| hsa-mir-376b-5p  | RORA |
| hsa-mir-143-5p   | RORA |
| hsa-mir-125b-5p  | RORA |
| hsa-mir-548h-3p  | RORA |
| hsa-mir-548ae-3p | RORA |
| hsa-mir-548aq-3p | RORA |

|                   |      |
|-------------------|------|
| hsa-mir-548ac     | RORA |
| hsa-let-7f-2-3p   | RORA |
| hsa-mir-548ah-3p  | RORA |
| hsa-mir-3941      | RORA |
| hsa-mir-548j-3p   | RORA |
| hsa-mir-548am-3p  | RORA |
| hsa-mir-4319      | RORA |
| hsa-mir-2054      | RORA |
| hsa-mir-1185-1-3p | RORA |
| hsa-mir-4694-3p   | RORA |
| hsa-mir-12135     | RORA |
| hsa-mir-6758-5p   | RORA |
| hsa-mir-1185-2-3p | RORA |

|                 |      |
|-----------------|------|
| hsa-mir-12136   | RORA |
| hsa-mir-374b-5p | RORA |
| hsa-mir-548z    | RORA |
| hsa-mir-1277-5p | RORA |
| hsa-mir-335-3p  | RORA |
| hsa-mir-18b-5p  | RORA |
| hsa-mir-374a-5p | RORA |
| hsa-mir-4752    | RORA |
| hsa-mir-8068    | RORA |
| hsa-mir-4698    | RORA |
| hsa-mir-548x-3p | RORA |
| hsa-mir-18a-5p  | RORA |
| hsa-mir-101-3p  | RORA |

|                  |        |
|------------------|--------|
| hsa-mir-4735-3p  | RORA   |
| hsa-mir-548aj-3p | RORA   |
| hsa-mir-3613-3p  | RORA   |
| hsa-mir-4795-3p  | RORA   |
| hsa-mir-5011-5p  | RORA   |
| hsa-mir-190a-3p  | RORA   |
| hsa-mir-548e-5p  | RORA   |
| hsa-mir-548m     | RORA   |
| hsa-mir-1252-3p  | SH2D1B |
| hsa-mir-3529-3p  | SH2D1B |
| hsa-mir-6845-3p  | SH2D1B |
| hsa-mir-203a-3p  | SH2D1B |
| hsa-mir-4803     | SH2D1B |

|                |        |
|----------------|--------|
| hsa-mir-12117  | SH2D1B |
| hsa-mir-628-3p | SH2D1B |
| hsa-mir-4425   | SH2D1B |

---

**Table S5:** List of the Top-5 miRNA targets of the biomarkers;

| miRNA           | Symbol |
|-----------------|--------|
| hsa-miR-26a-5p  | ADM    |
| hsa-miR-338-5p  | ADM    |
| hsa-miR-365b-3p | ADM    |
| hsa-miR-1297    | ADM    |
| hsa-miR-4465    | ADM    |
| hsa-miR-1297    | CBLB   |

|                 |       |
|-----------------|-------|
| hsa-miR-30e-5p  | CBLB  |
| hsa-miR-148a-3p | CBLB  |
| hsa-miR-152-3p  | CBLB  |
| hsa-miR-95-5p   | CBLB  |
| hsa-miR-148b-3p | CBLB  |
| hsa-miR-3163    | CBLB  |
| hsa-miR-7853-5p | FASLG |
| hsa-miR-105-5p  | FASLG |
| hsa-miR-590-5p  | FASLG |
| hsa-miR-21-5p   | FASLG |
| hsa-miR-8485    | FASLG |
| hsa-miR-6734-3p | MMP9  |
| hsa-miR-548ak   | NRG1  |



|                  |      |
|------------------|------|
| hsa-miR-548bb-5p | NRG1 |
| hsa-miR-95-5p    | NRG1 |
| hsa-miR-4645-3p  | NRG1 |
| hsa-miR-3920     | NRG1 |
| hsa-miR-137-3p   | NRG1 |
| hsa-miR-6875-3p  | NRG1 |
| hsa-miR-3163     | NRG1 |
| hsa-miR-6780a-5p | PI3  |
| hsa-miR-6779-5p  | PI3  |
| hsa-miR-1273h-5p | PI3  |
| hsa-miR-30b-3p   | PI3  |
| hsa-miR-7106-5p  | PI3  |
| hsa-miR-33a-3p   | RORA |

|                  |        |
|------------------|--------|
| hsa-miR-2052     | RORA   |
| hsa-miR-95-5p    | RORA   |
| hsa-miR-3163     | RORA   |
| hsa-miR-548c-3p  | RORA   |
| hsa-miR-338-5p   | RORA   |
| hsa-miR-137-3p   | RORA   |
| hsa-miR-8485     | RORA   |
| hsa-miR-548e-5p  | RORA   |
| hsa-miR-30e-5p   | RORA   |
| hsa-miR-548m     | RORA   |
| hsa-miR-548ak    | RORA   |
| hsa-miR-548bb-5p | RORA   |
| hsa-miR-3163     | SH2D1B |

|                 |        |
|-----------------|--------|
| hsa-miR-628-3p  | SH2D1B |
| hsa-miR-33a-3p  | SH2D1B |
| hsa-miR-548c-3p | SH2D1B |
| hsa-miR-4425    | SH2D1B |
| hsa-miR-2052    | SH2D1B |

**Table S6:** List of the potential therapeutic drugs against the biomarkers obtained from the Drug–Gene Interaction Database.

| <b>gene</b> | <b>Drug</b>  | <b>Interaction Type &amp;<br/>Directionality</b> | <b>Sources</b> | <b>PMIDs</b> | <b>Query<br/>Score</b> | <b>Interaction<br/>Score</b> |
|-------------|--------------|--------------------------------------------------|----------------|--------------|------------------------|------------------------------|
| ADM         | ALTEPLASE    | n/a                                              | NCI            | 10848972     | 0.91                   | 0.93                         |
| ADM         | PAROXETINE   | n/a                                              | PharmGKB       | 19636336     | 0.36                   | 0.74                         |
| ADM         | INDOMETHACIN | n/a                                              | NCI            | 10830296     | 0.25                   | 0.5                          |
| ADM         | INSULIN      | n/a                                              | NCI            | 12668590     | 0.17                   | 0.35                         |

|          |              |     |         |                                                 |      |      |
|----------|--------------|-----|---------|-------------------------------------------------|------|------|
| CBL<br>B | FLUOROURACIL | n/a | JAX-CKB | 24351824                                        | 0.08 | 0.59 |
| MMP<br>9 | BEVACIZUMAB  | n/a | CIViC   | 26921265                                        | 0.28 | 0.33 |
| NRG<br>1 | AFATINIB     | n/a | CIViC   | 31068372 28950338 29802158 29169524<br>28502724 | 2.58 | 1.55 |
| NRG<br>1 | PERTUZUMAB   | n/a | CIViC   | 29802158                                        | 1.08 | 0.64 |
| NRG<br>1 | ALTEPLASE    | n/a | NCI     | 11679632                                        | 0.91 | 0.27 |
| NRG<br>1 | BUPIVACAINE  | n/a | NCI     | 17294200                                        | 0.86 | 0.52 |
| NRG      | LAPATINIB    | n/a | CIViC   | 25691057 21840482                               | 0.48 | 0.29 |

|     |             |     |          |                   |      |      |  |
|-----|-------------|-----|----------|-------------------|------|------|--|
| 1   |             |     |          |                   |      |      |  |
| NRG | PROGESTERON | n/a | NCI      | 12529413 10597237 | 0.39 | 0.12 |  |
| 1   | E           |     |          |                   |      |      |  |
| NRG | ISOPROTEREN | n/a | NCI      | 14732742          | 0.31 | 0.18 |  |
| 1   | OL          |     |          |                   |      |      |  |
| NRG | CETUXIMAB   | n/a | CIViC    | 21900593          | 0.3  | 0.18 |  |
| 1   |             |     | PharmGKB |                   |      |      |  |
| NRG | PANITUMUMAB | n/a | PharmGKB | None found        | 0.2  | 0.12 |  |
| 1   |             |     |          |                   |      |      |  |
| NRG | COLCHICINE  | n/a | NCI      | 7666195           | 0.19 | 0.11 |  |
| 1   |             |     |          |                   |      |      |  |
| NRG | NICOTINE    | n/a | NCI      | 18784291          | 0.18 | 0.11 |  |
| 1   |             |     |          |                   |      |      |  |

|     |             |     |       |          |      |      |  |
|-----|-------------|-----|-------|----------|------|------|--|
| NRG |             |     |       |          |      |      |  |
| 1   | ERLOTINIB   | n/a | CIViC | 29802158 | 0.18 | 0.11 |  |
| NRG |             |     |       |          |      |      |  |
| 1   | VINCRIStINE | n/a | NCI   | 17999741 | 0.15 | 0.09 |  |
| NRG |             |     |       |          |      |      |  |
| 1   | TAMOXIFEN   | n/a | NCI   | 18283314 | 0.15 | 0.09 |  |
| NRG |             |     |       |          |      |      |  |
| 1   | ASPIRIN     | n/a | NCI   | 10921413 | 0.12 | 0.07 |  |
| NRG |             |     |       |          |      |      |  |
| 1   | CARBOPLATIN | n/a | CIViC | 23390248 | 0.11 | 0.07 |  |
| NRG |             |     |       |          |      |      |  |
| 1   | GEMCITABINE | n/a | CIViC | 23390248 | 0.11 | 0.06 |  |
| NRG |             |     |       |          |      |      |  |
| 1   | DEXAMETHASO | n/a | NCI   | 7599067  | 0.1  | 0.06 |  |

|     |             |     |          |                  |      |      |  |
|-----|-------------|-----|----------|------------------|------|------|--|
| 1   | NE          |     |          |                  |      |      |  |
| NRG |             |     |          |                  |      |      |  |
| 1   | PACLITAXEL  | n/a | CIViC    | 23390248         | 0.09 | 0.05 |  |
| NRG |             |     |          |                  |      |      |  |
| 1   | CISPLATIN   | n/a | CIViC    | 23390248         | 0.06 | 0.04 |  |
| PI3 | PROGESTERON | n/a | NCI      | 14521952         | 0.26 | 1.85 |  |
|     | E           |     |          |                  |      |      |  |
| ROR |             |     |          |                  |      |      |  |
| A   | MELATONIN   | n/a | NCI      | 8702678 12595746 | 0.5  | 2.38 |  |
| ROR |             |     |          |                  |      |      |  |
| A   | CITALOPRAM  | n/a | PharmGKB | 19846067         | 0.26 | 1.25 |  |
